# Supplementary material
Source: MDPI journal article supplement (https://www.mdpi.com/2073-445X/11/3/351)

### Ablative study of different thresholds for 3-level classification in our study

| Study    | Level-1                                                           | Level-2                                                   | Level-3a                                                                  | Level-3b                                                               |
|----------|-------------------------------------------------------------------|-----------------------------------------------------------|---------------------------------------------------------------------------|------------------------------------------------------------------------|
| 1        | -1 to 0: non-vegetation<br>0 to 1: vegetation                     | 0 to 0.30: shrub<br><br>0.30 to 1: trees                  | 0 to 0.15: stressed shrub<br>0.15 to 0.30: healthy shrub                  | 0.30 to 0.40: stressed trees<br>0.40 to 1: healthy trees               |
| 2        | -1 to 0.20: Non-vegetation,<br>0.20 to 1: vegetation              | 0.20 to 0.40: shrub<br>0.40 to 1: trees                   | 0.20 to 0.30: stressed shrub<br>0.30 to 0.40: healthy shrub               | 0.40 to 0.50: stressed trees<br>0.50 to 1: healthy trees               |
| 3        | -1 to 0.25: non-vegetation<br>0.25 to 1: vegetation               | 0.25 to 0.35: shrub<br>0.35 to 1: trees                   | 0.25 to 0.30: stressed shrub<br>0.30 to 0.35: healthy shrub               | 0.35 to 0.45: stressed trees<br>0.45 to 1: healthy trees               |
| <b>4</b> | <b>-1 to 0.19: non-vegetation</b><br><b>0.19 to 1: vegetation</b> | <b>0.19 to 0.50: shrub</b><br><br><b>0.50 to 1: trees</b> | <b>0.19 to 0.40: stressed shrub</b><br><b>0.40 to 0.50: healthy shrub</b> | <b>0.50 to 0.60: stressed trees</b><br><b>0.60 to 1: healthy trees</b> |

Table S1: Ablative study of different thresholds for 3-level classification. Note that boldface represents the **optimal thresholds** used in our work.

Study 1:

Level-1

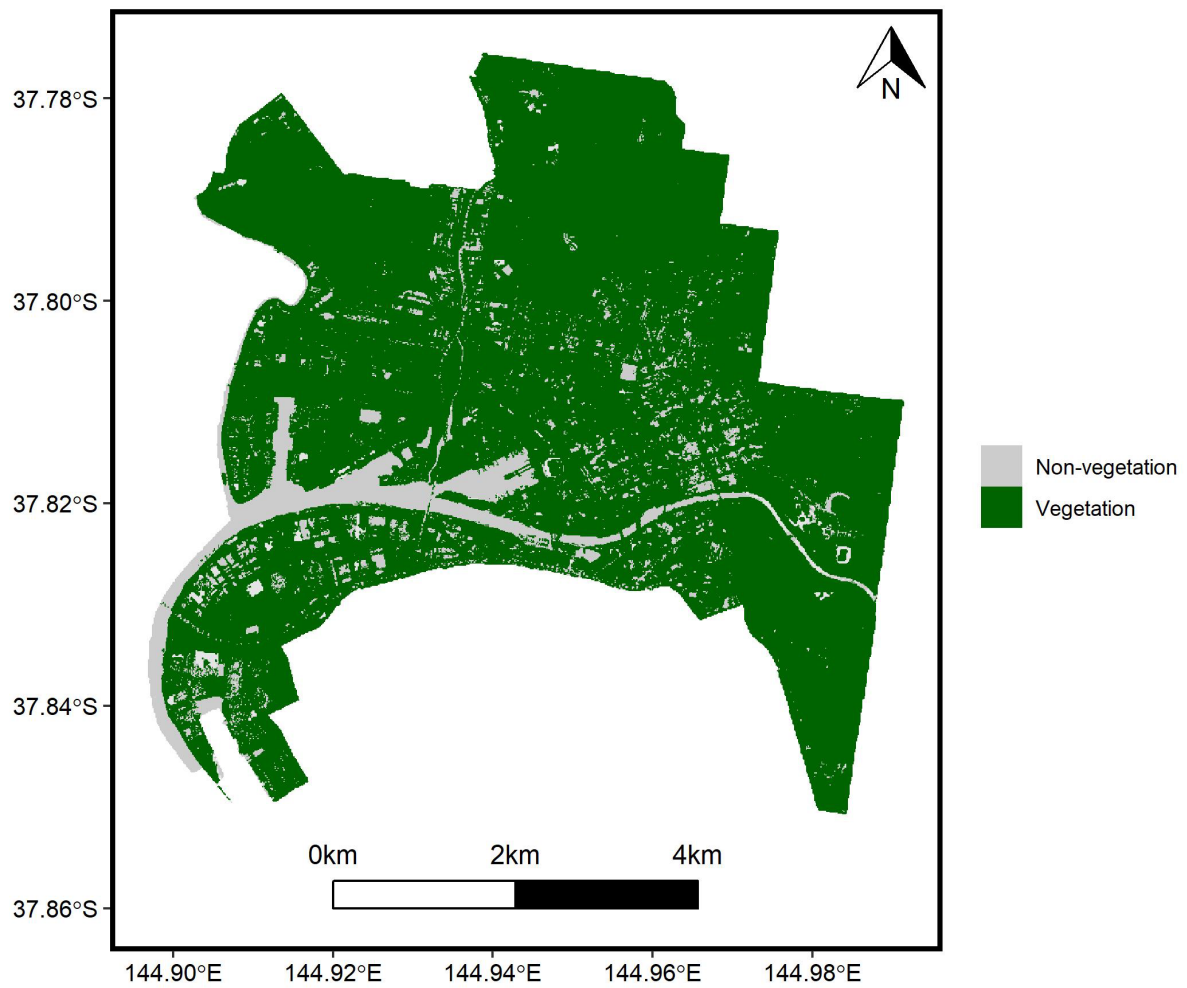

Level-2

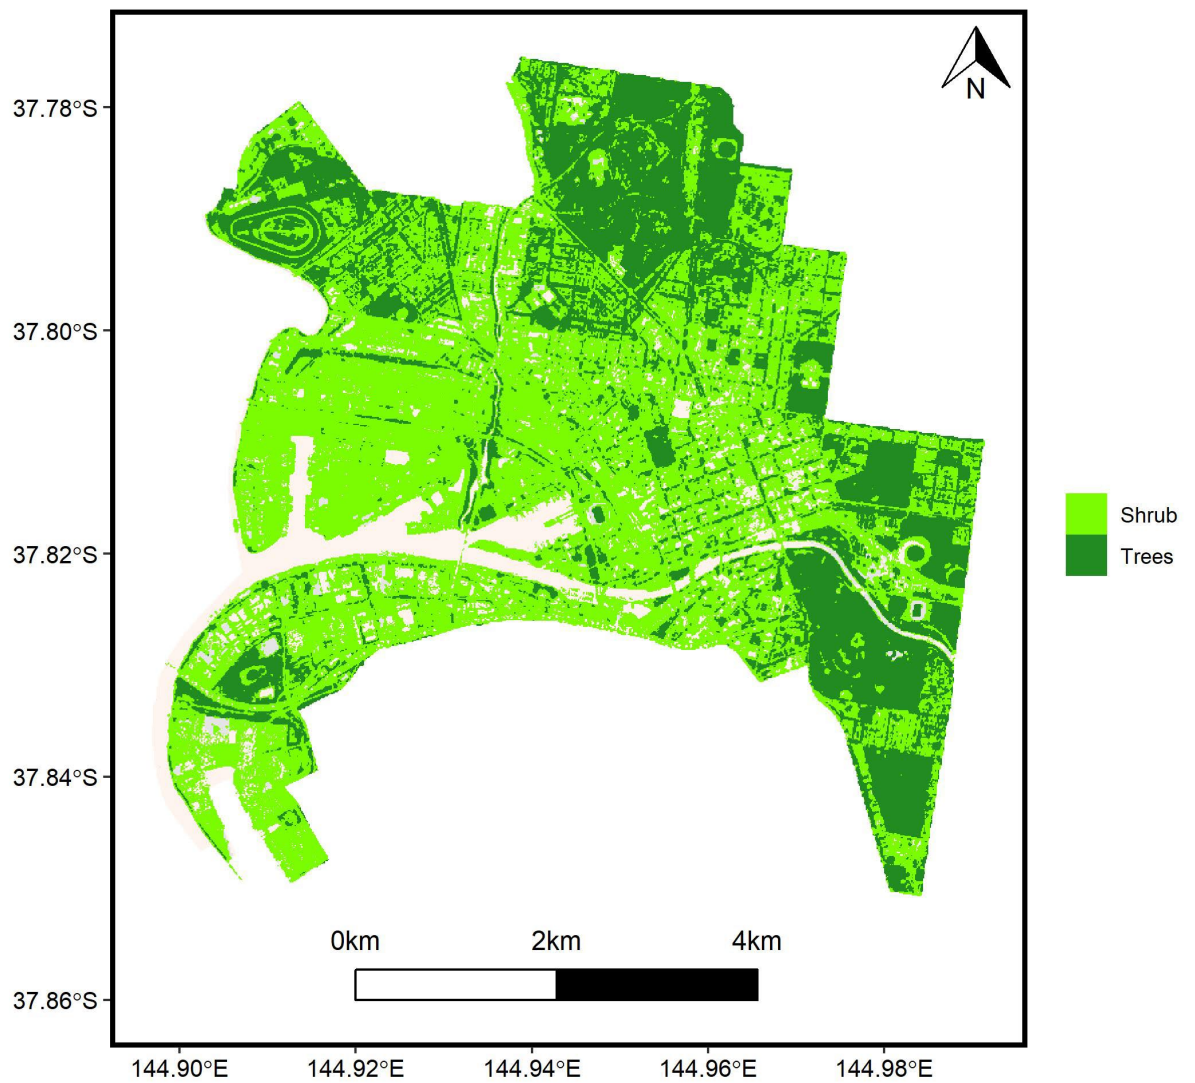

Level-3a

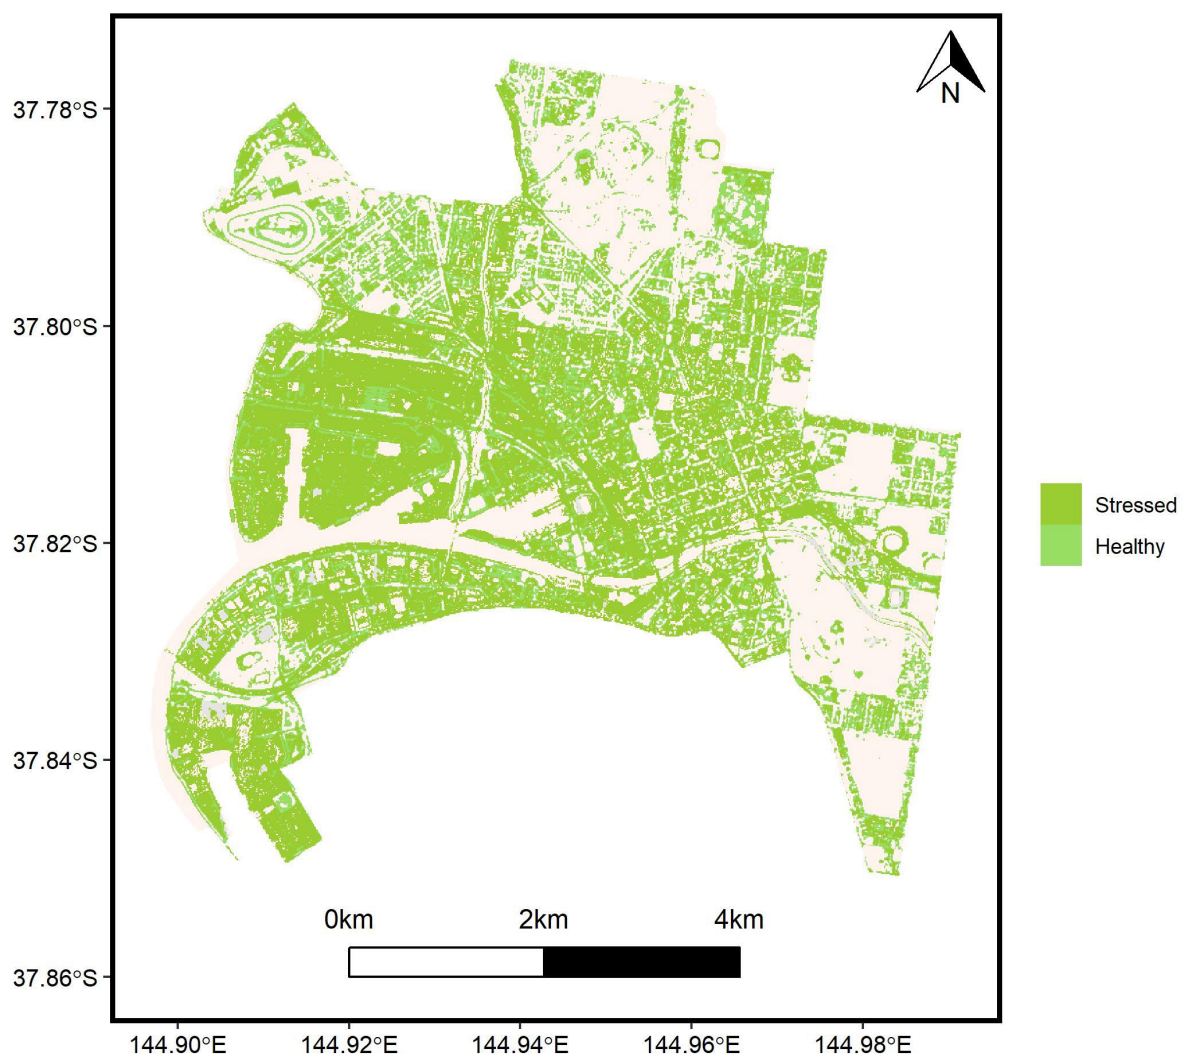

Level-3b

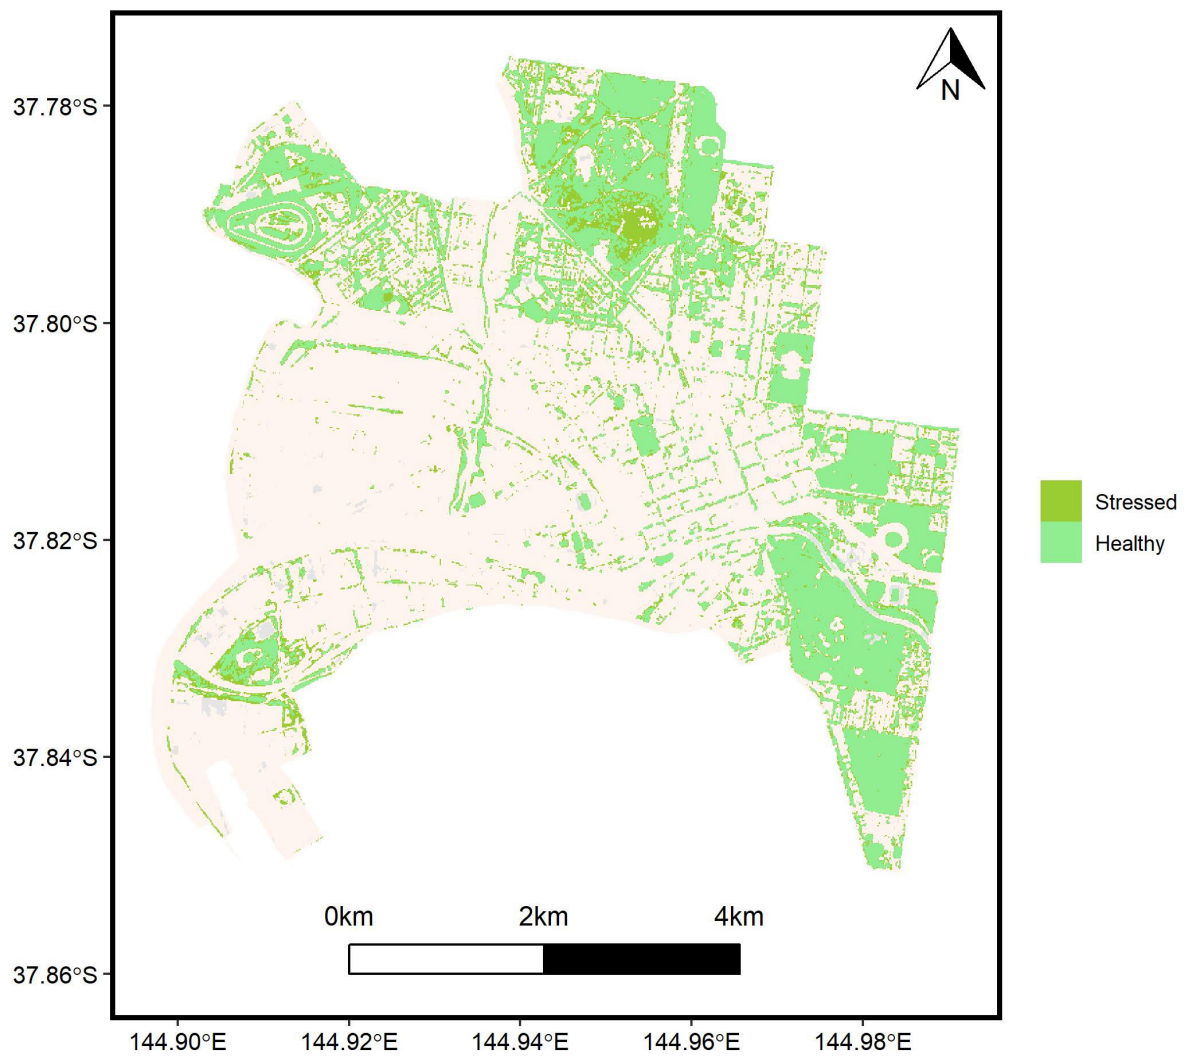

Study 2:

Level 1:

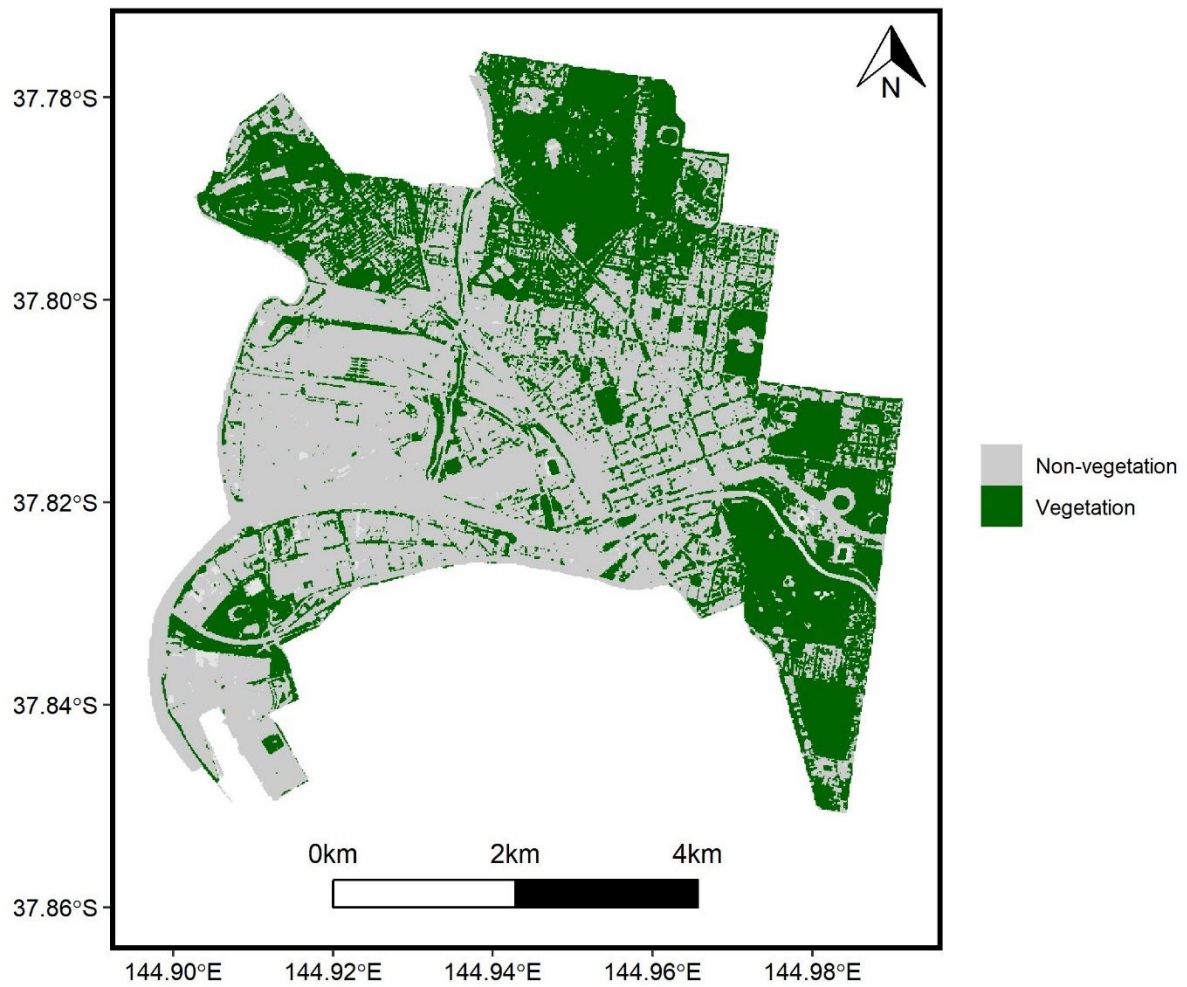



Level 2:

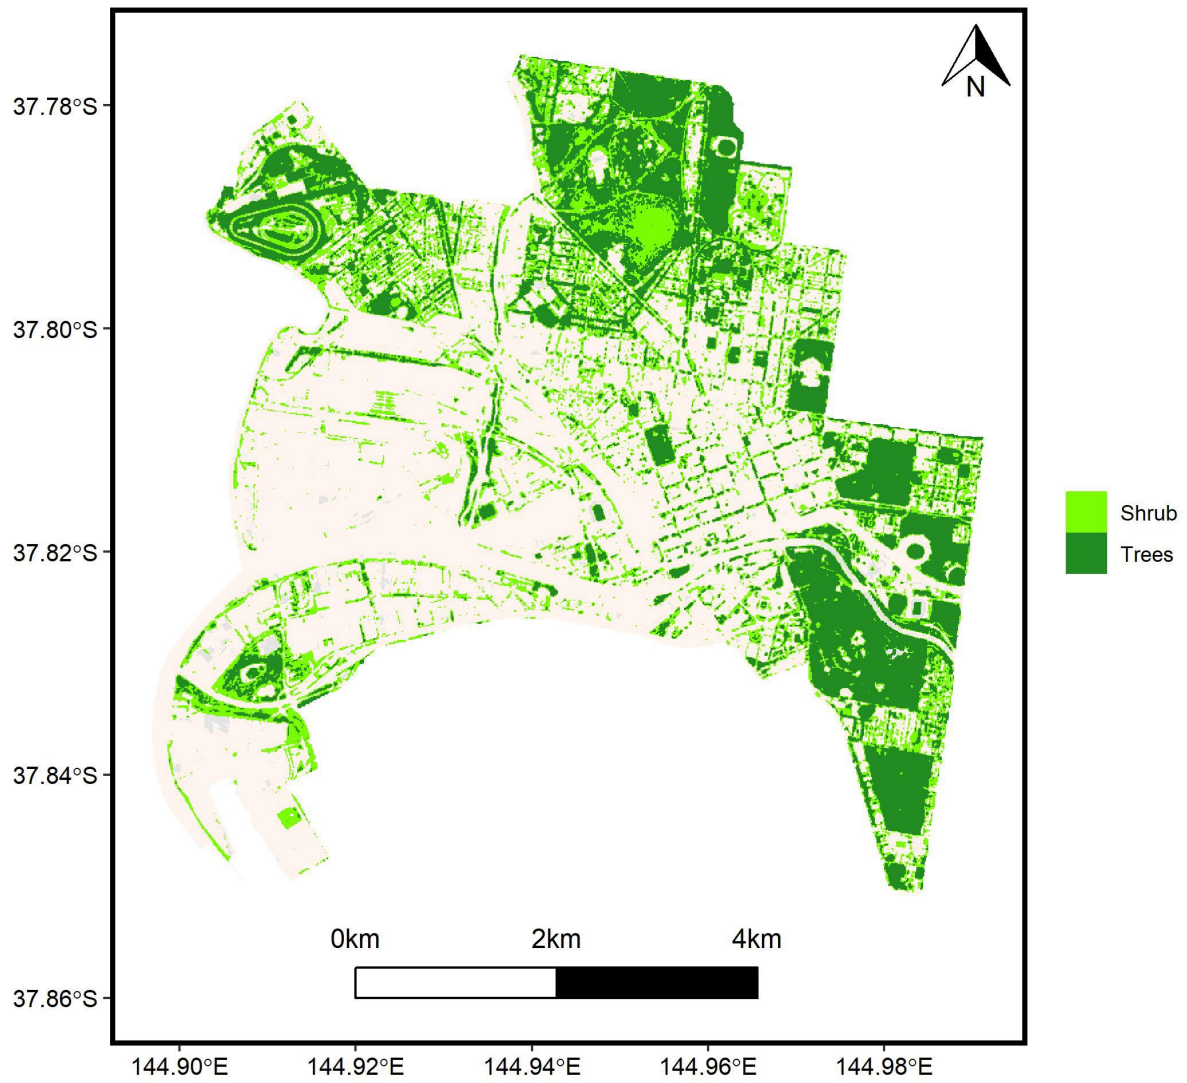

Level 3a:

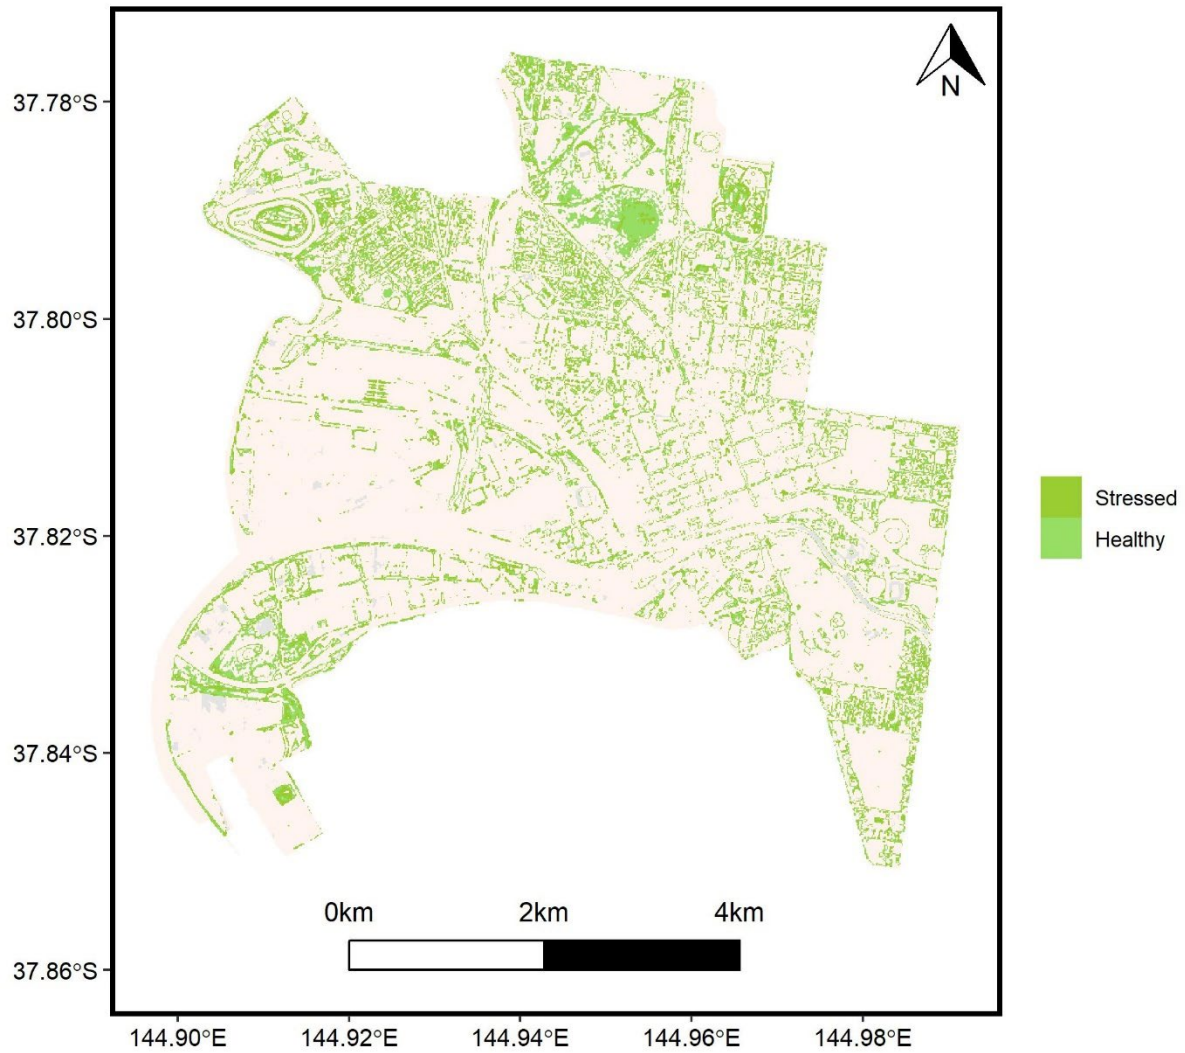



Level 3b

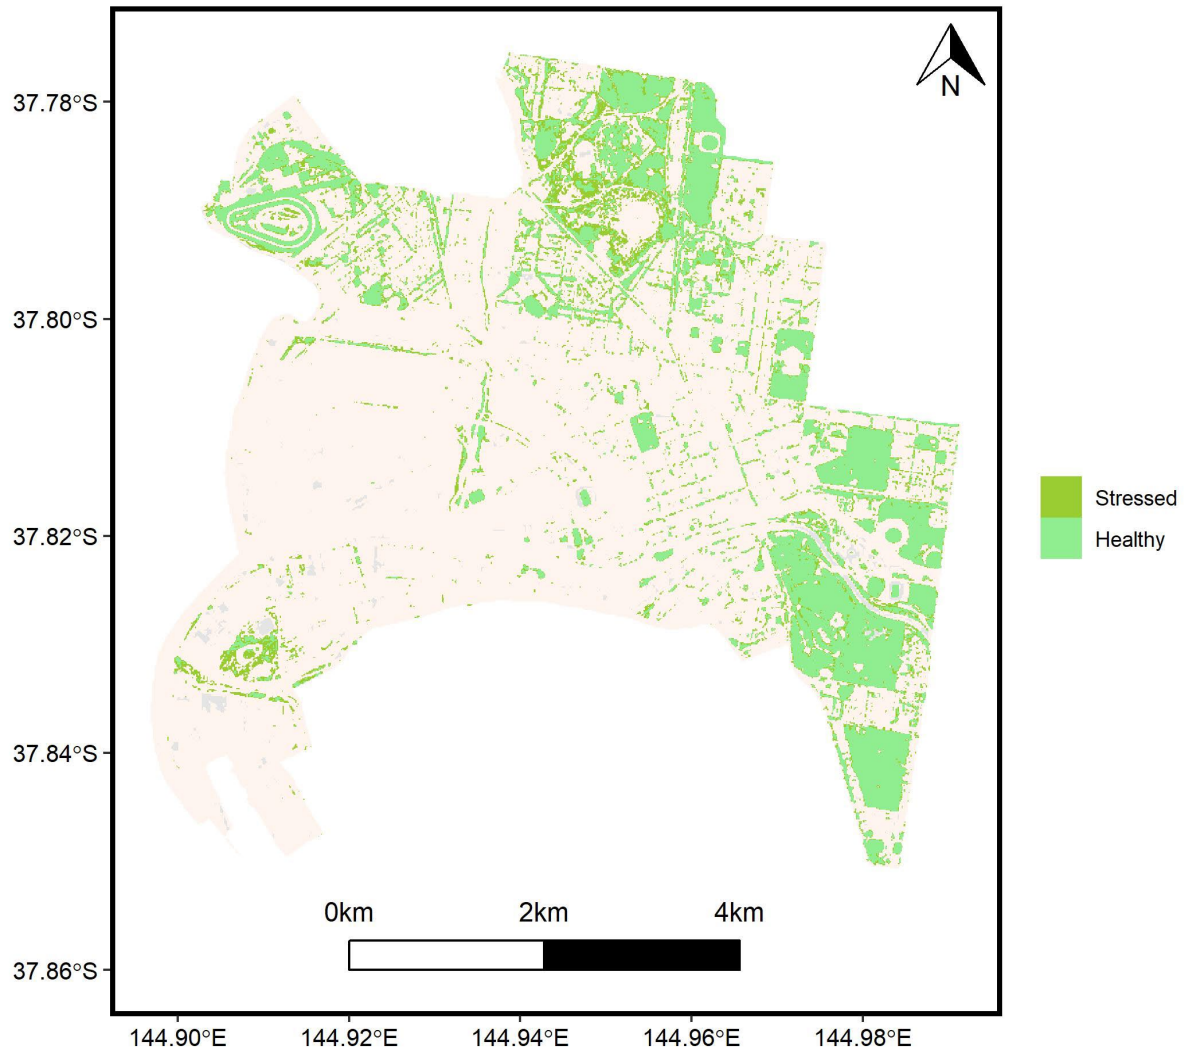

Study 3:

Level 1

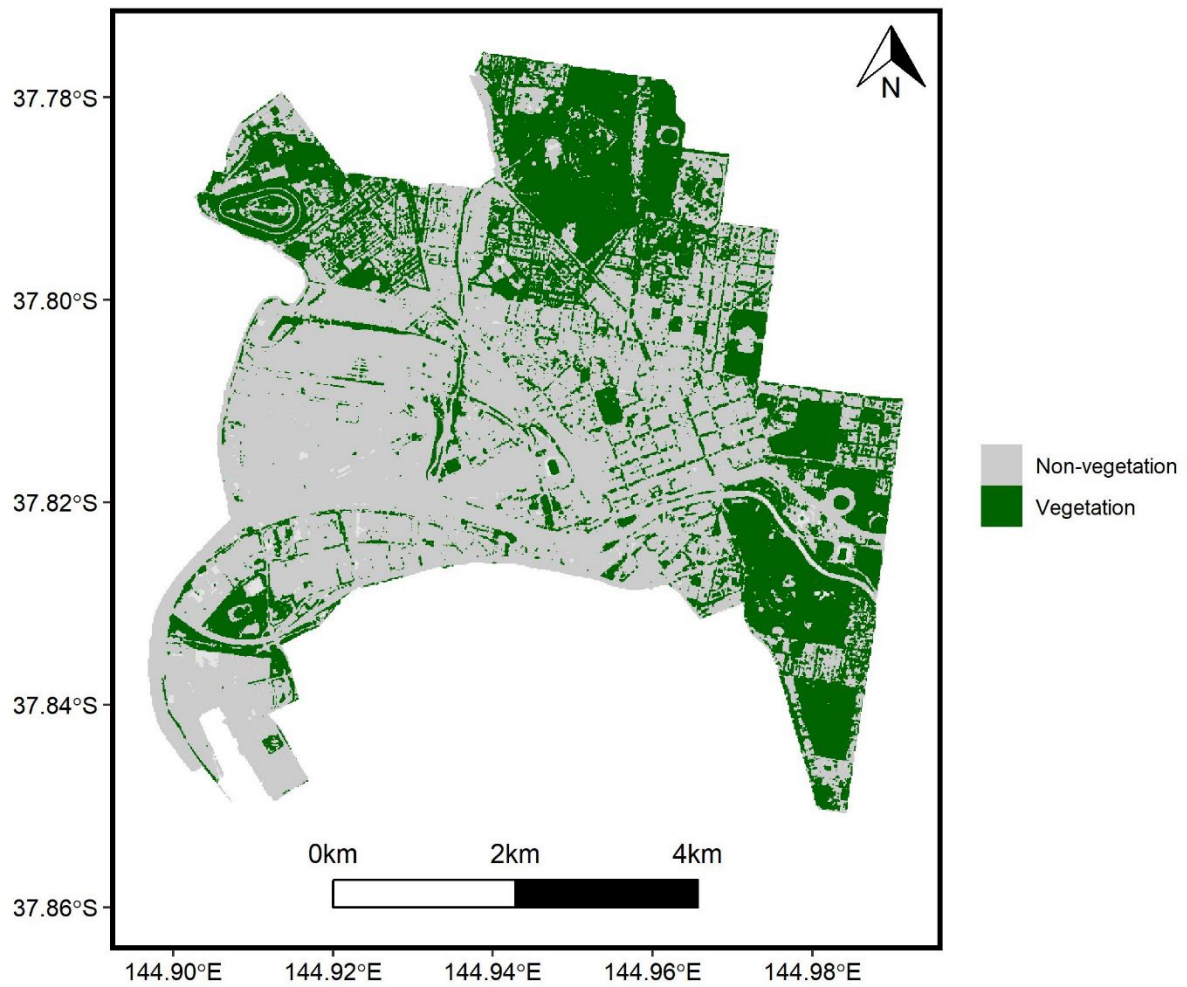

## Level 2

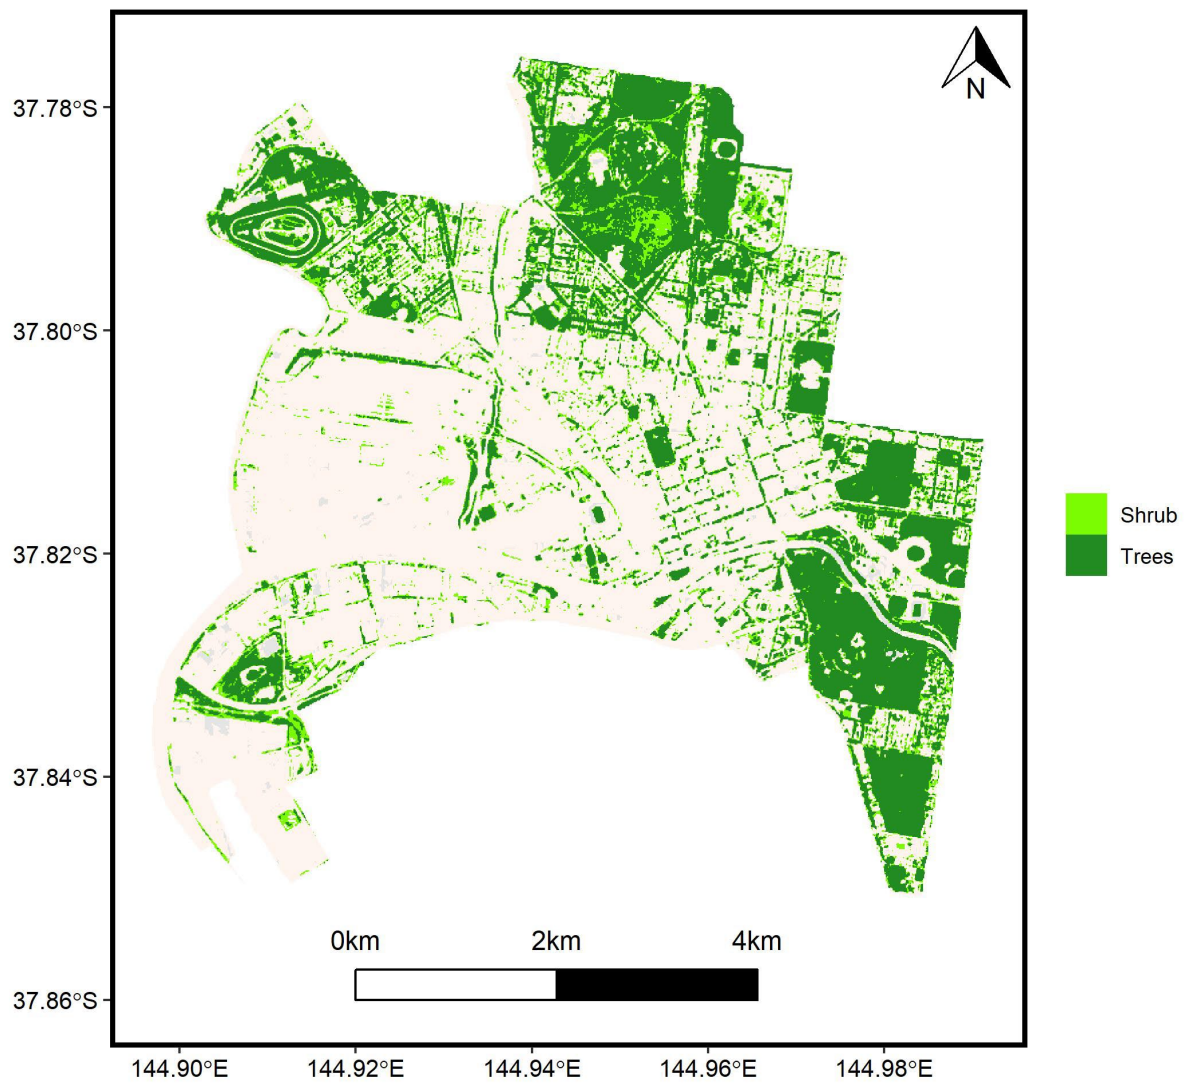

## Level 3a

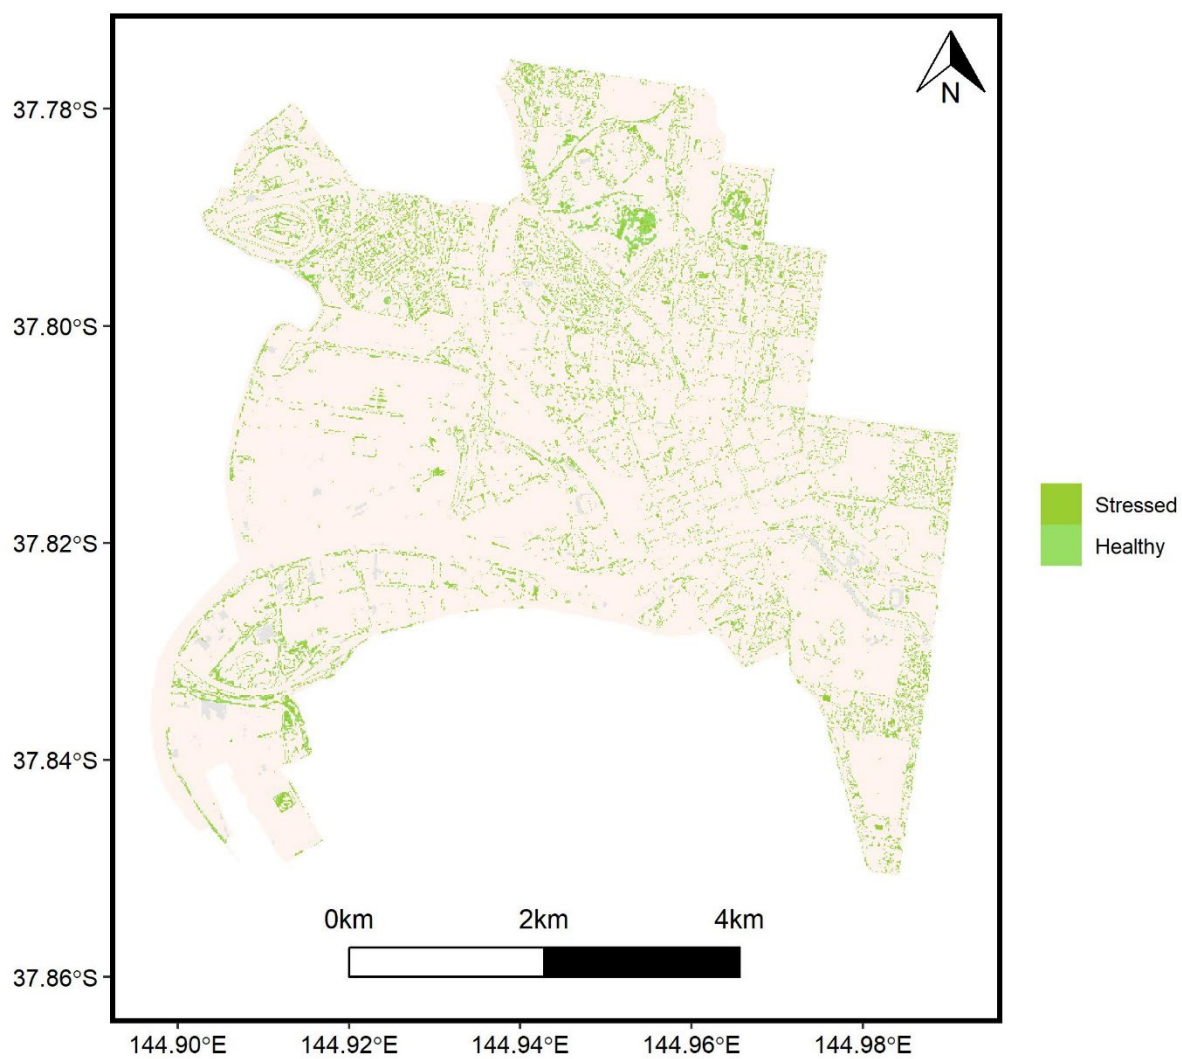

Level 3b

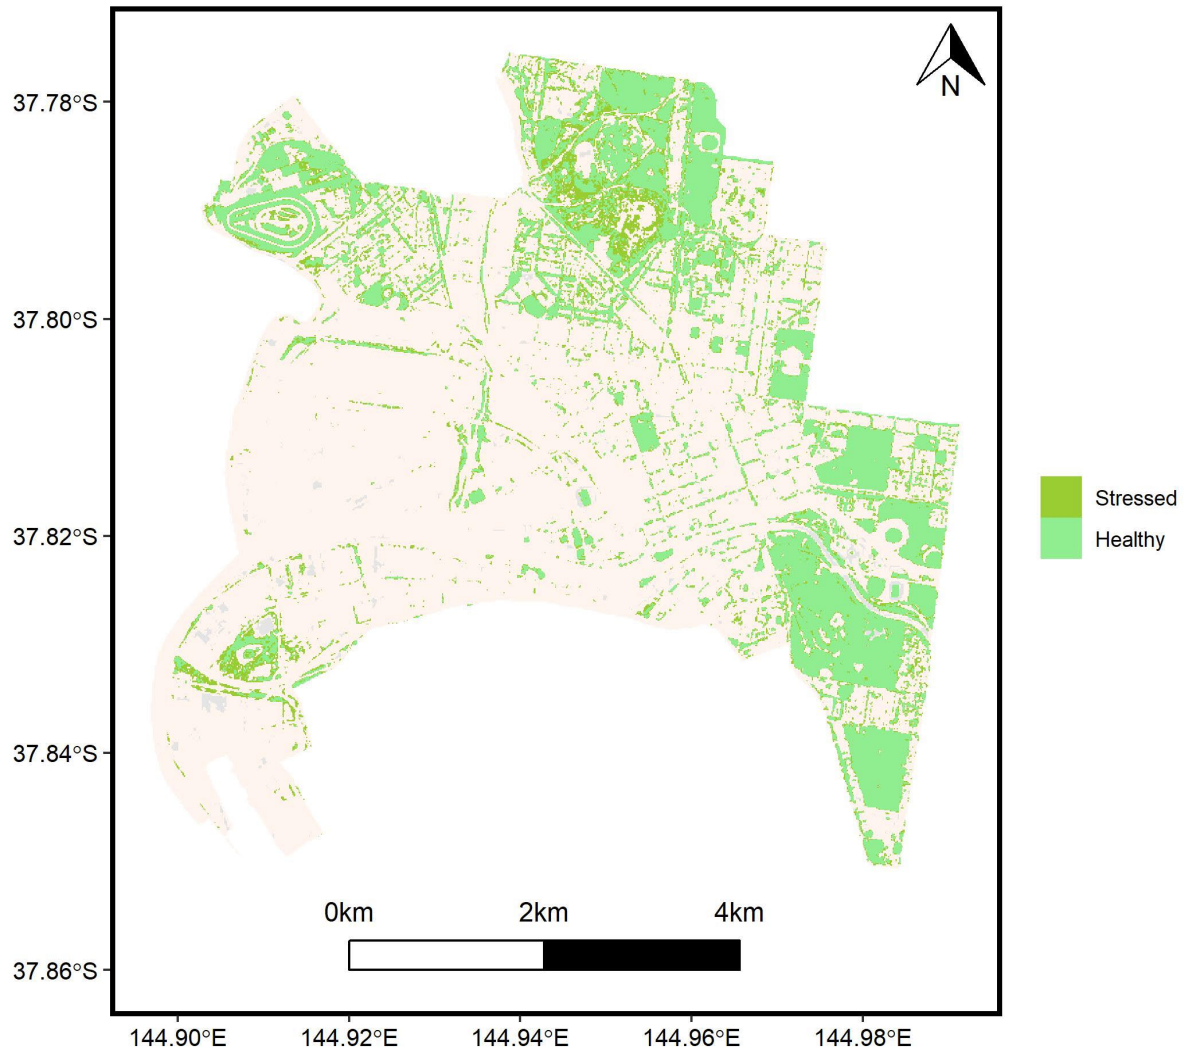



Study 4:

Level 1

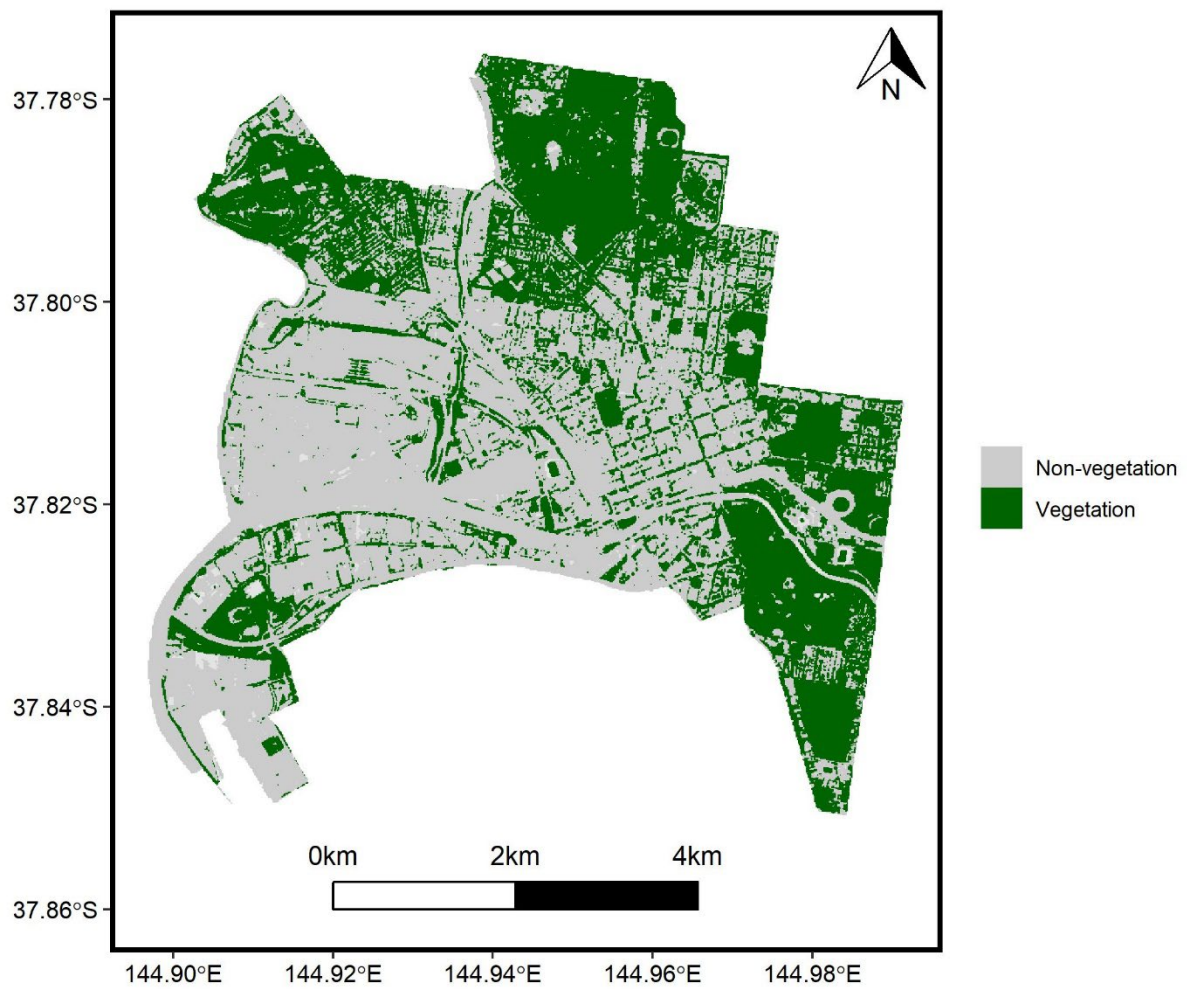



## Level 2

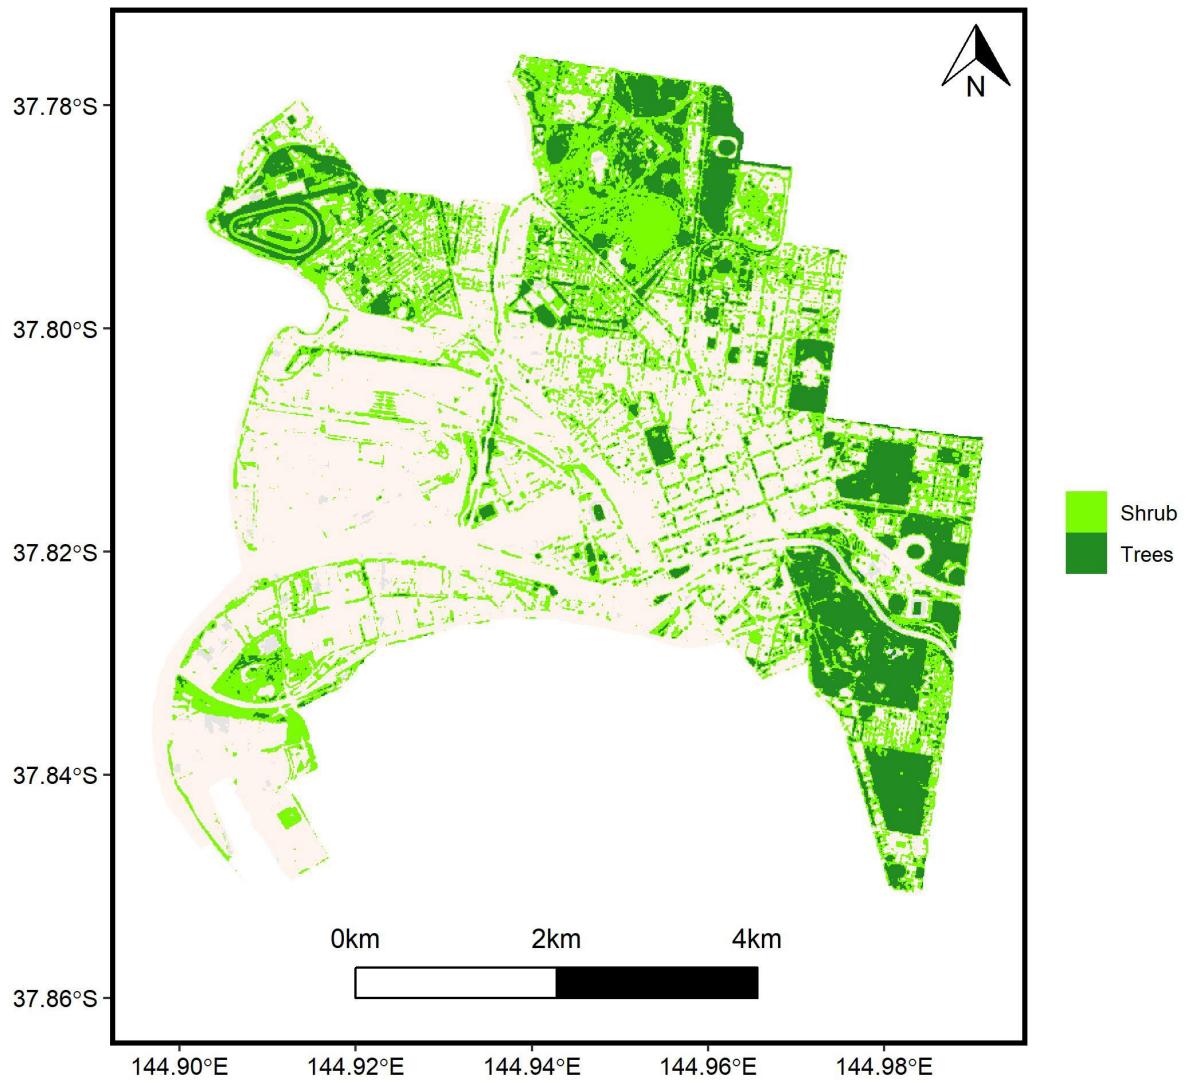

Level 3a

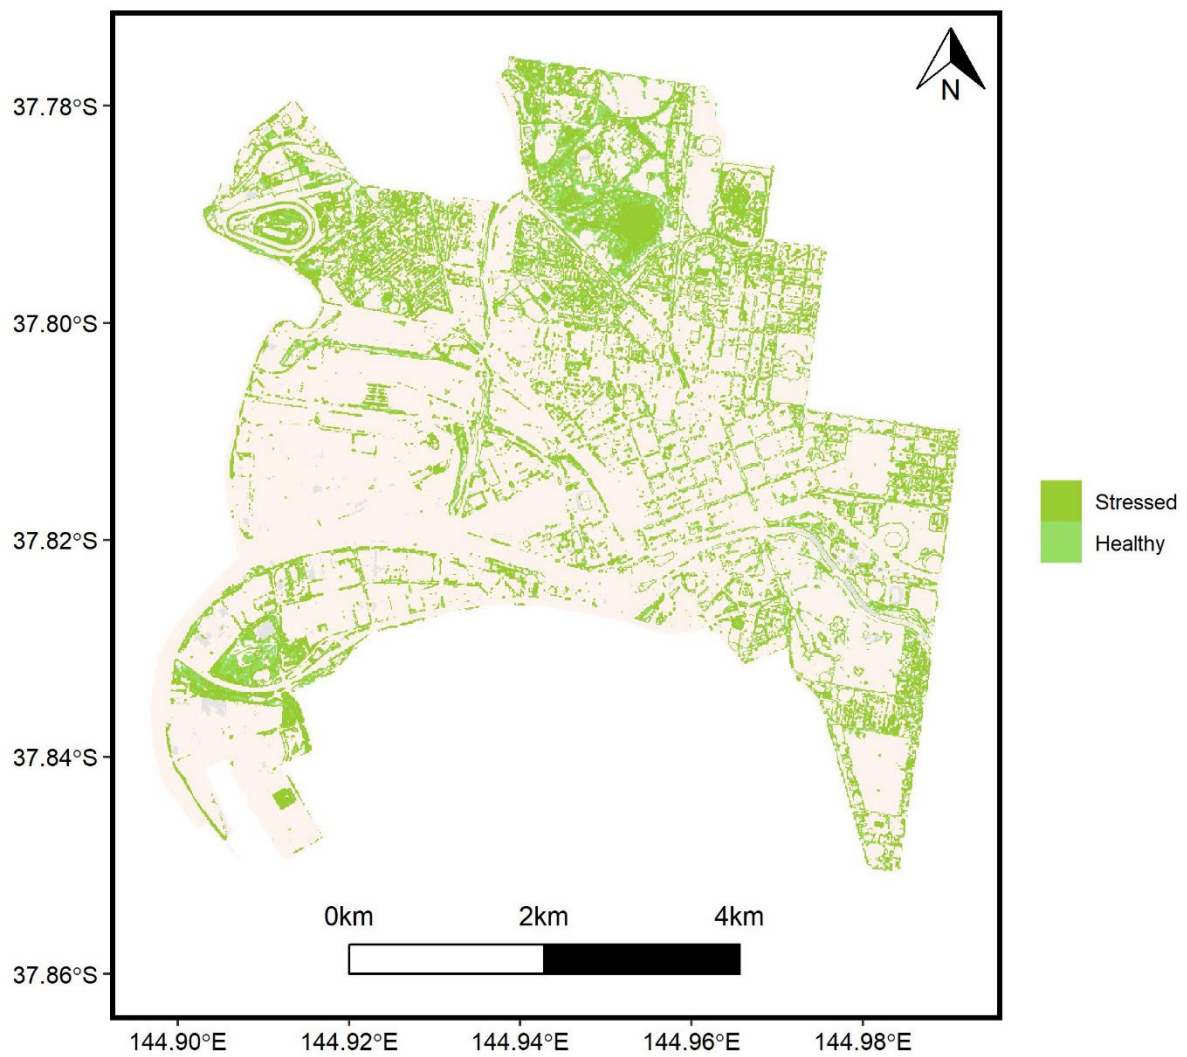

Level 3b

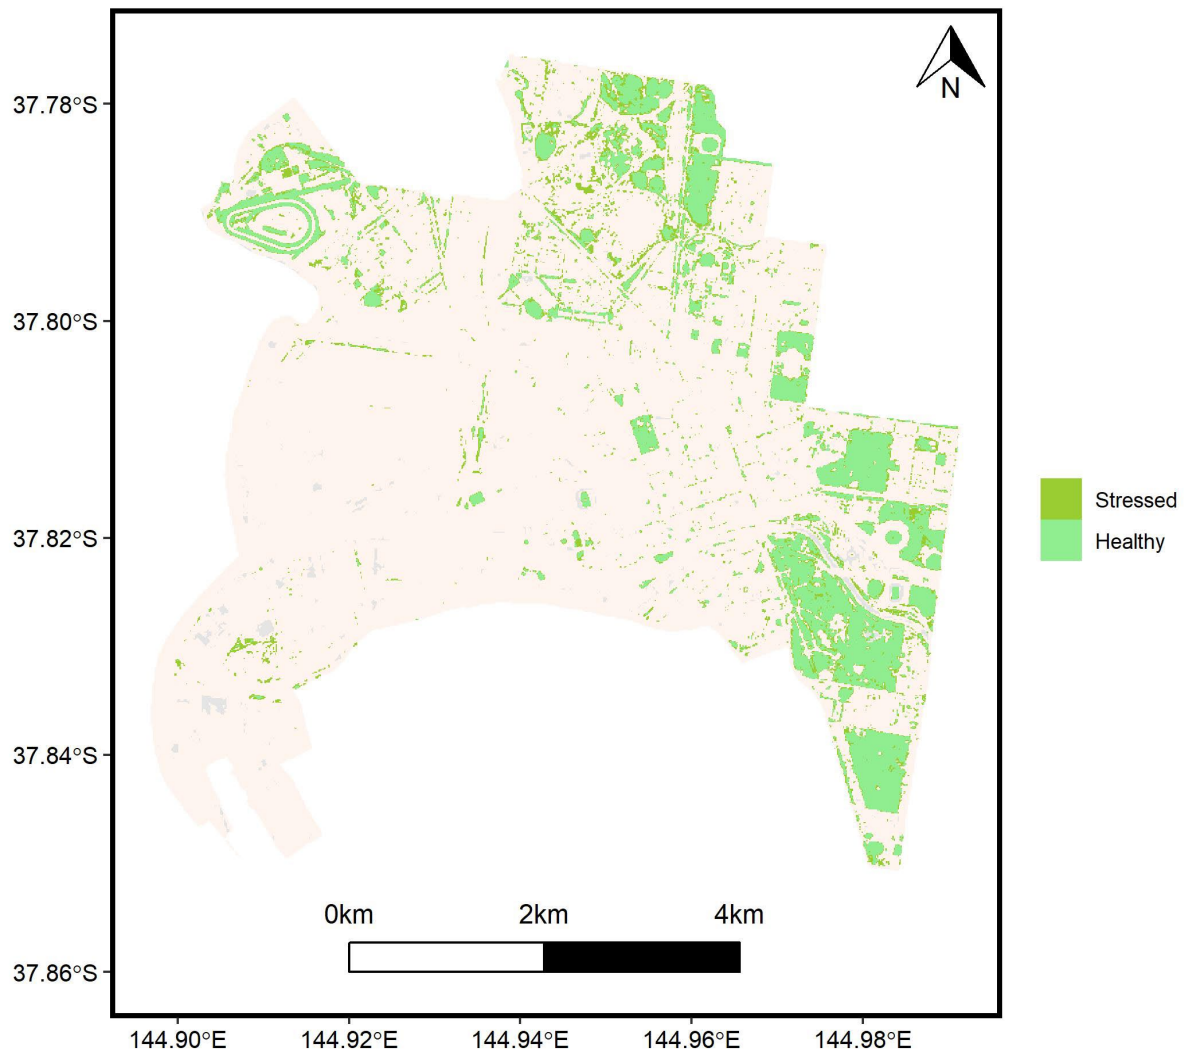

Supplement: s1 [file s1]
