# Supplementary material
Source: MDPI journal article supplement (https://www.mdpi.com/2073-445X/11/3/351)
Supplement: s1 [file s1]

Archive with 2 entries (2 files):
- Supplementary_file1.pdf
- Supplementary_file2.pdf
