# Supplementary material
Source: MDPI journal article supplement (https://www.mdpi.com/2073-445X/11/3/351)
Supplement: s1 [file s1 › Supplementary_file2.pdf]

## 78 LGAs with classified maps of Victoria, Australia

### Alpine

Unclassified image

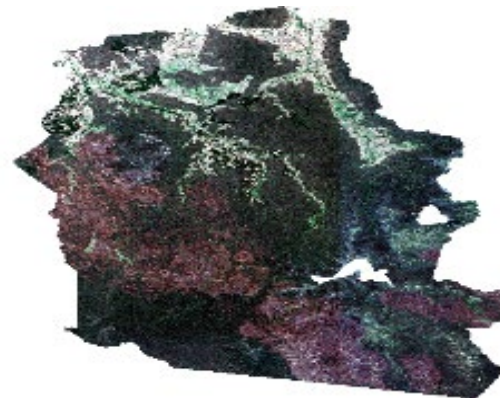

Level-1 classification

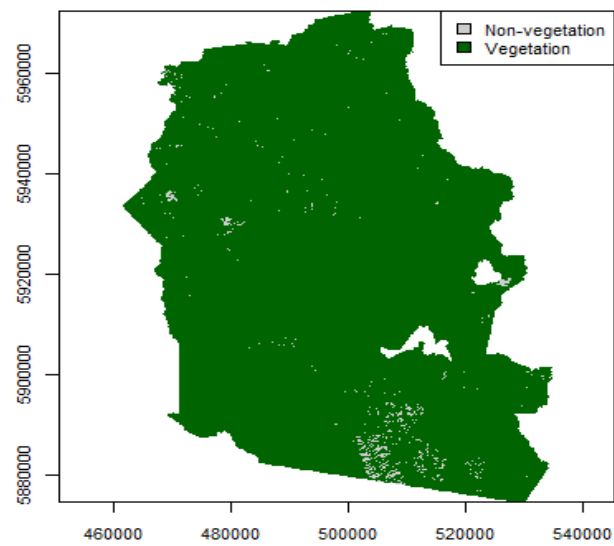

Level-2 classification

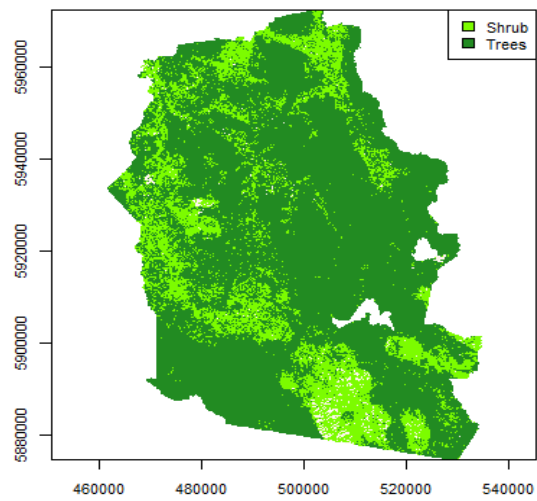

Level-3a classification

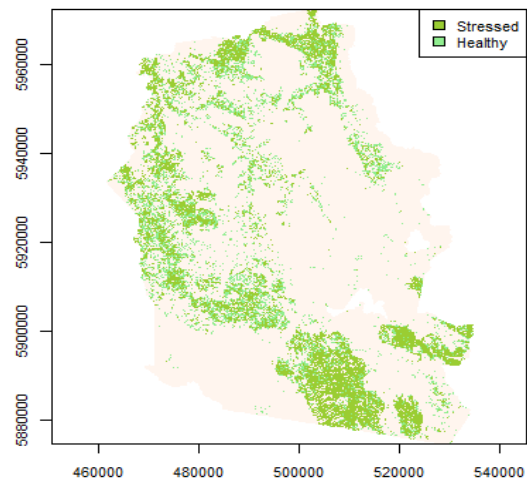

Level-3b classification

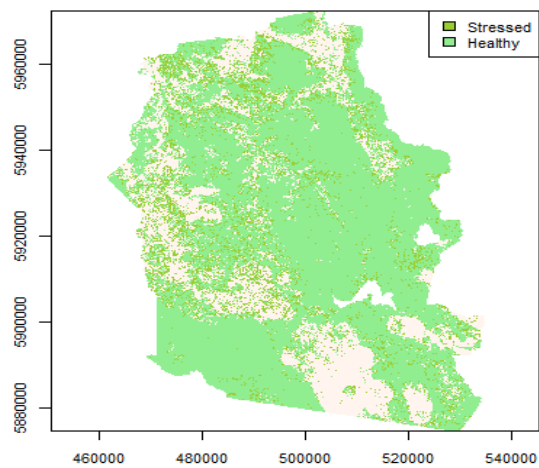

Ararat:

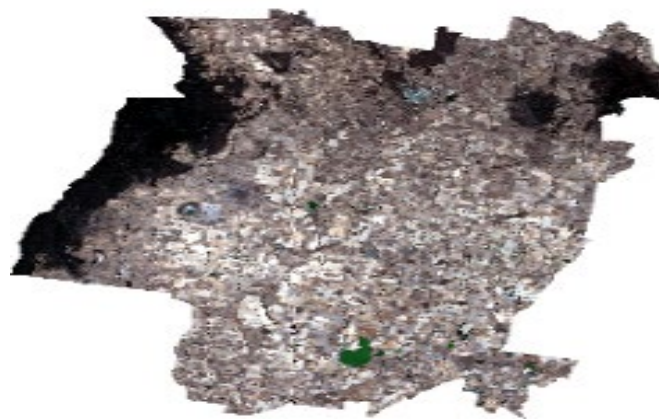

Unclassified image

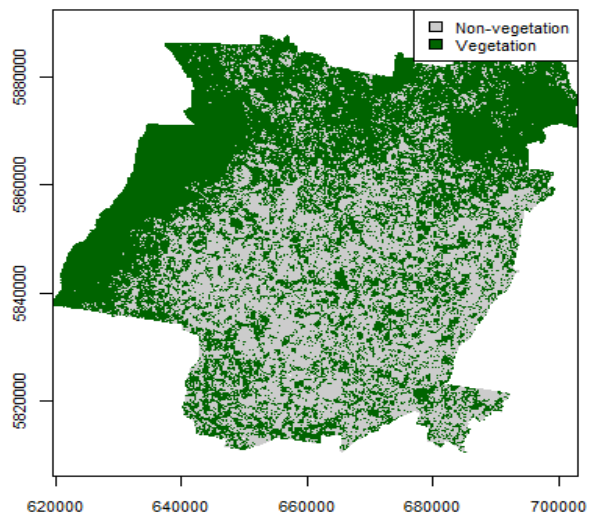

Level-1 classification

Level-2 classification

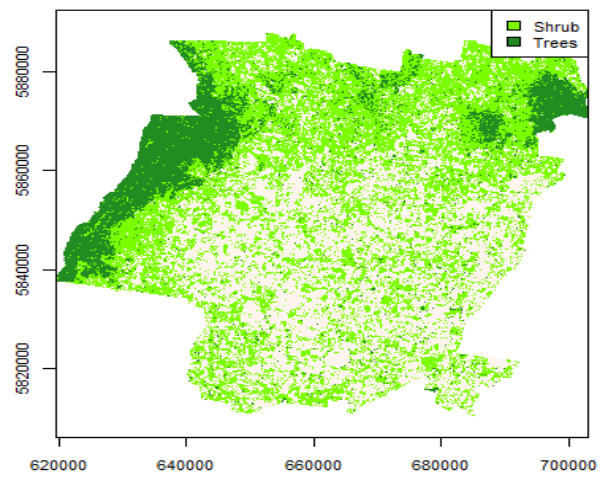

Level-3a classification

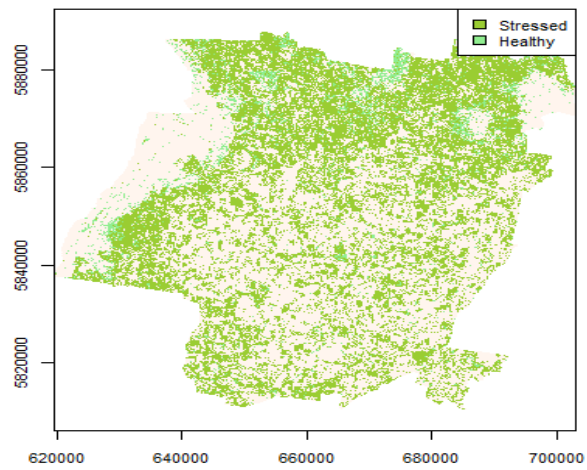

Level-3b classification

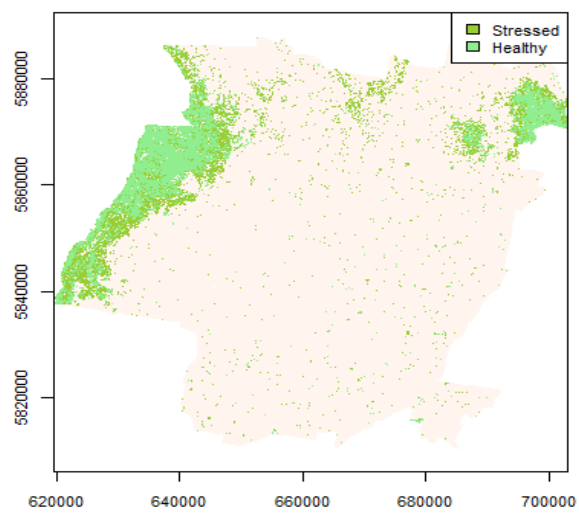

## Ballarat

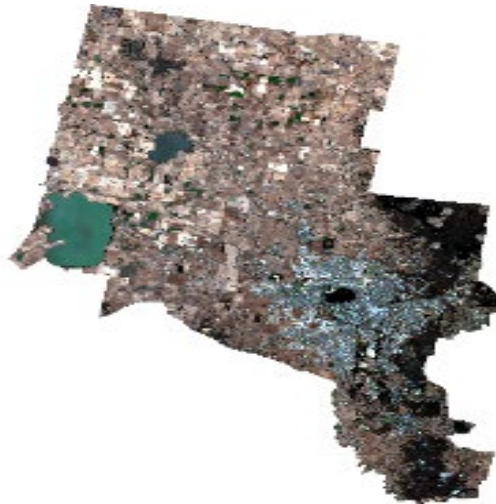

Unclassified image

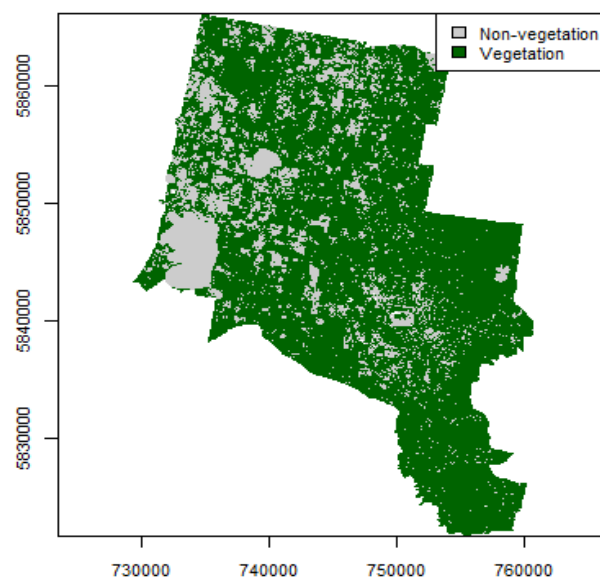

Level-1 classification

Level-2 classification

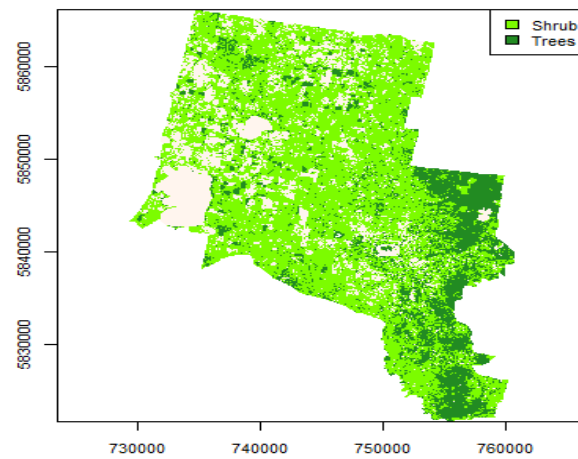

Level-3a classification

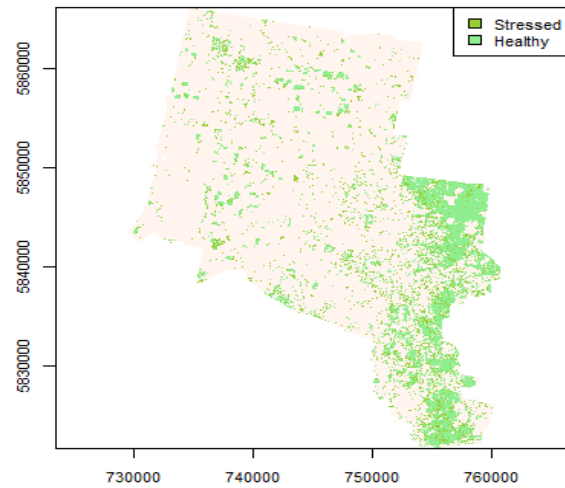

Level-3b classification

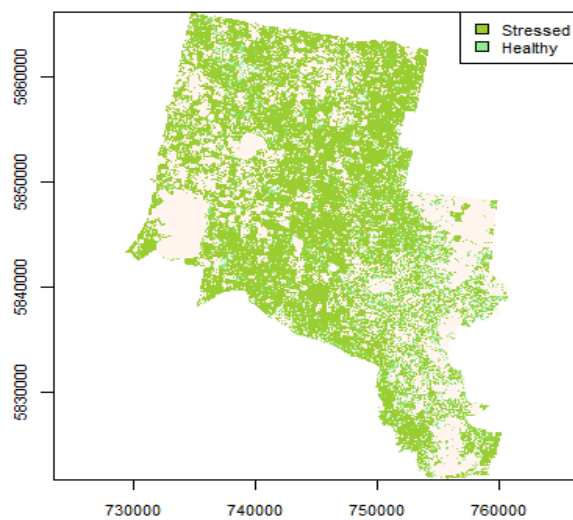

## Remaining LGAs

| LGA        | Original (RGB) | Level-1 | Level-2 | Level-3a | Level-3b |
|------------|----------------|---------|---------|----------|----------|
| Banyule    |                |         |         |          |          |
| Baw Baw    |                |         |         |          |          |
| Bayside    |                |         |         |          |          |
| Benalla    |                |         |         |          |          |
| Boroondara |                |         |         |          |          |
| Brimbank   |                |         |         |          |          |
| Buloke     |                |         |         |          |          |

|                    |  |  |  |  |  |
|--------------------|--|--|--|--|--|
| Campaspe           |  |  |  |  |  |
| Cardinia           |  |  |  |  |  |
| Casey              |  |  |  |  |  |
| Central Goldfields |  |  |  |  |  |
| Colac-otway        |  |  |  |  |  |
| Corangamite        |  |  |  |  |  |
| Darebin            |  |  |  |  |  |
| East Gippsland     |  |  |  |  |  |
| Frankston          |  |  |  |  |  |

|                     |                                                                                     |                                                                                     |                                                                                      |                                                                                       |                                                                                       |
|---------------------|-------------------------------------------------------------------------------------|-------------------------------------------------------------------------------------|--------------------------------------------------------------------------------------|---------------------------------------------------------------------------------------|---------------------------------------------------------------------------------------|
| Gannawarr-a         | 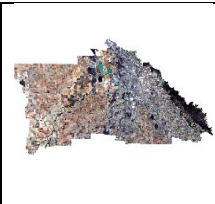   | 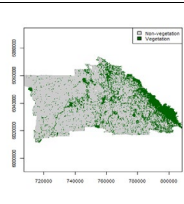   | 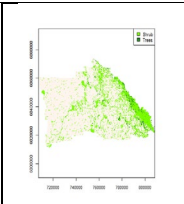   | 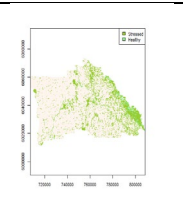   | 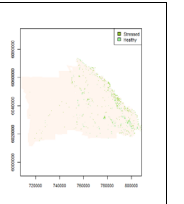   |
| Glen Eira           | 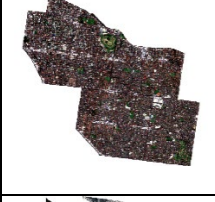   | 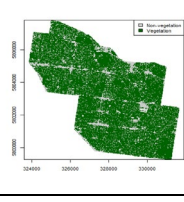   | 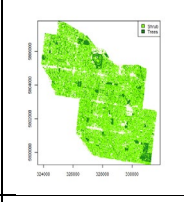   | 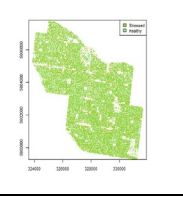   | 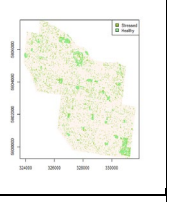   |
| Glenelg             | 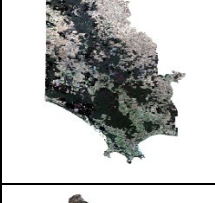   | 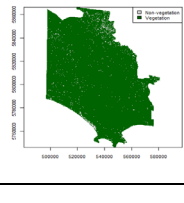   | 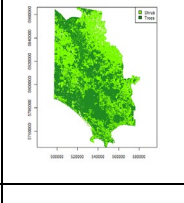   | 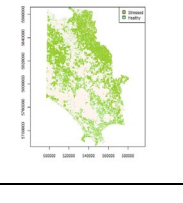   | 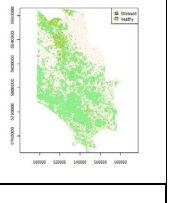   |
| Golden Plains       | 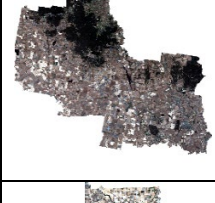  | 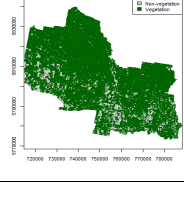  | 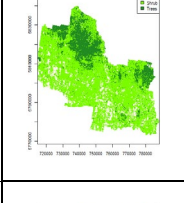  | 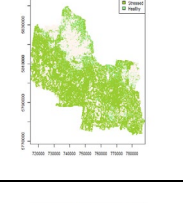  | 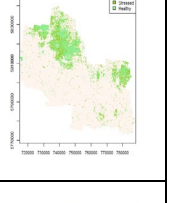  |
| Greater Bendigo     | 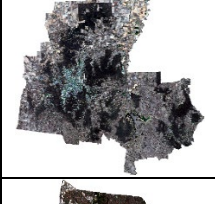 | 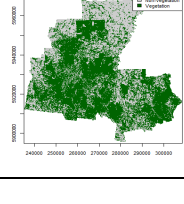 | 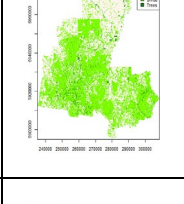 | 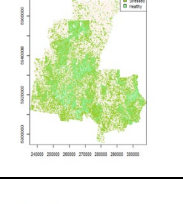 | 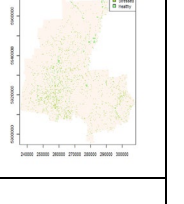 |
| Greater Dandenong   | 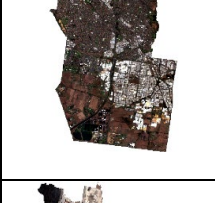 | 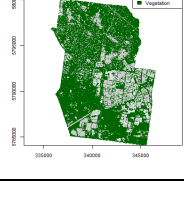 | 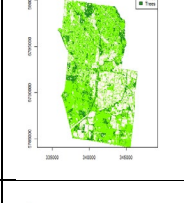 | 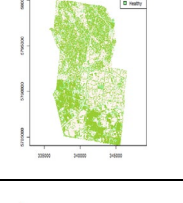 | 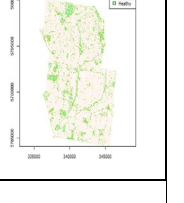 |
| Greater Geelong     | 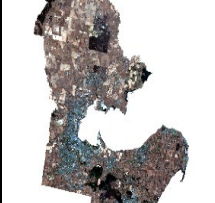 | 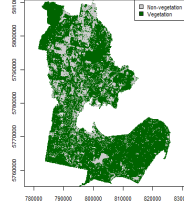 | 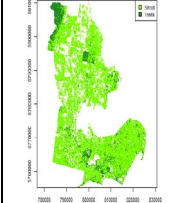 | 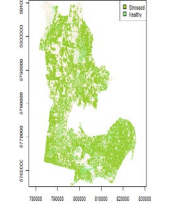 | 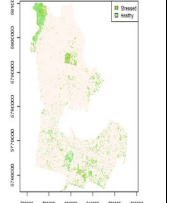 |
| Greater Shepparto-n | 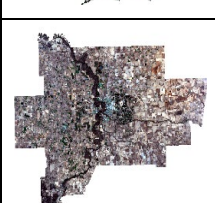 | 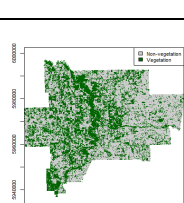 | 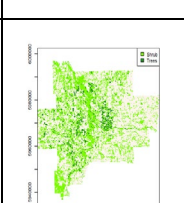 | 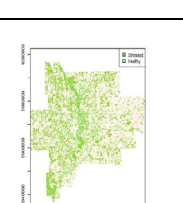 | 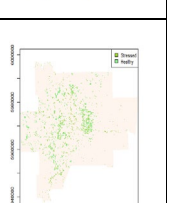 |

|             |                                                                                     |                                                                                     |                                                                                      |                                                                                       |                                                                                       |
|-------------|-------------------------------------------------------------------------------------|-------------------------------------------------------------------------------------|--------------------------------------------------------------------------------------|---------------------------------------------------------------------------------------|---------------------------------------------------------------------------------------|
| Hepburn     | 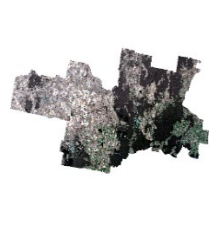   | 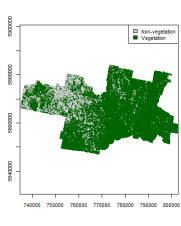   | 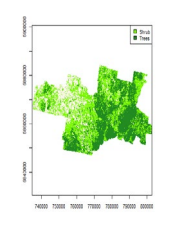   | 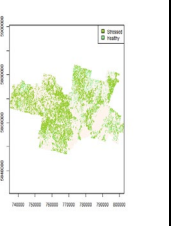   | 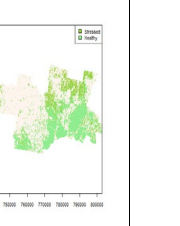   |
| Hindmarsh   | 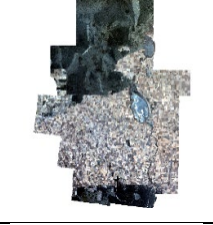   | 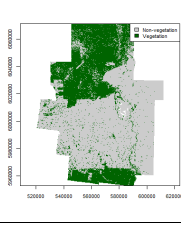   | 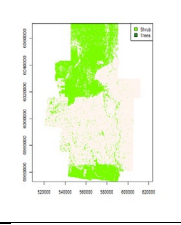   | 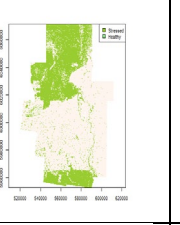   | 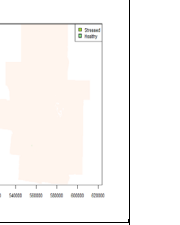   |
| Hobsons Bay | 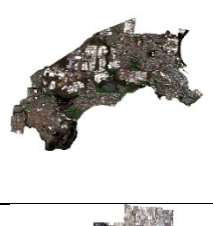   | 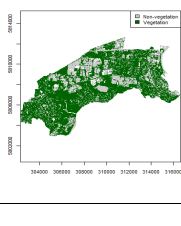   | 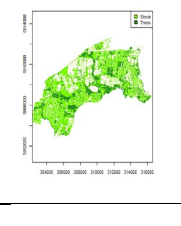   | 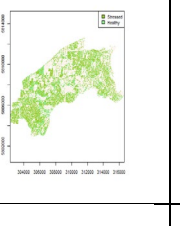   | 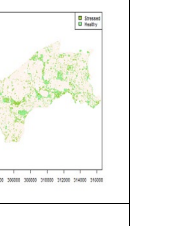   |
| Horsham     | 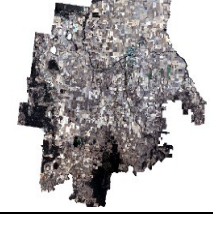  | 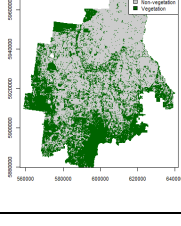  | 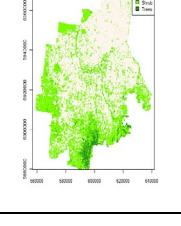  | 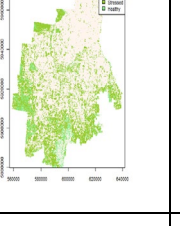  | 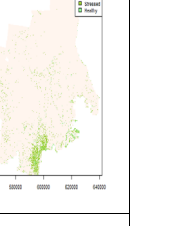  |
| Hume        | 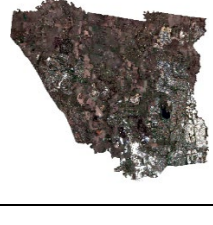 | 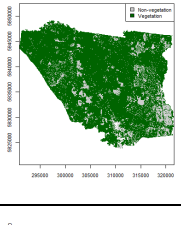 | 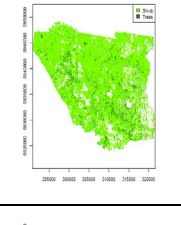 | 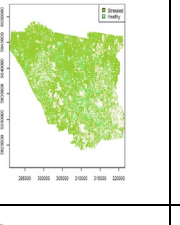 | 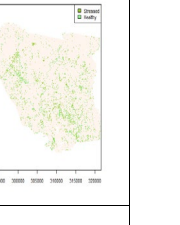 |
| Indigo      | 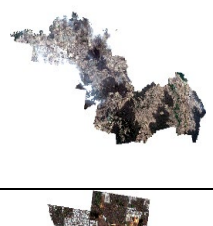 | 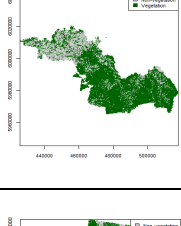 | 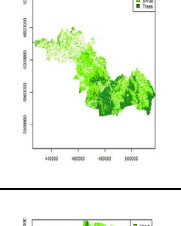 | 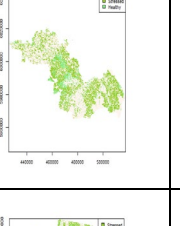 | 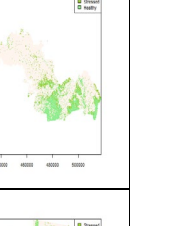 |
| Kingston    | 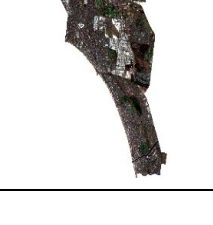 | 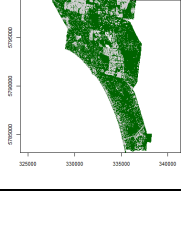 | 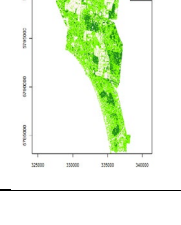 | 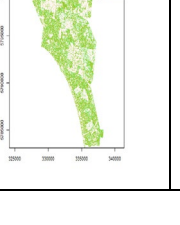 | 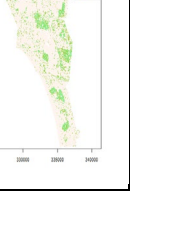 |

|                |                                                                                     |                                                                                     |                                                                                      |                                                                                       |                                                                                       |
|----------------|-------------------------------------------------------------------------------------|-------------------------------------------------------------------------------------|--------------------------------------------------------------------------------------|---------------------------------------------------------------------------------------|---------------------------------------------------------------------------------------|
| Knox           | 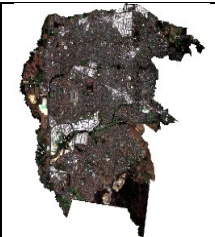   | 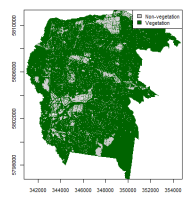   | 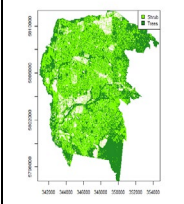   | 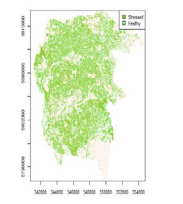   | 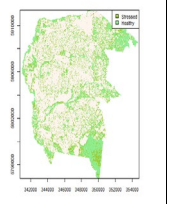   |
| Latrobe        | 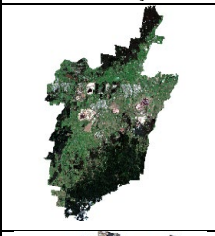   | 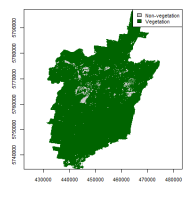   | 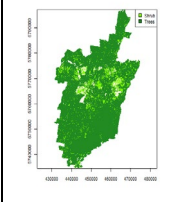   | 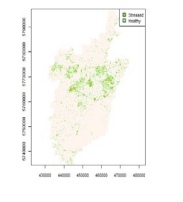   | 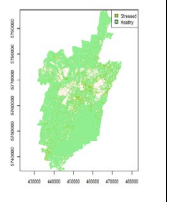   |
| Loddon         | 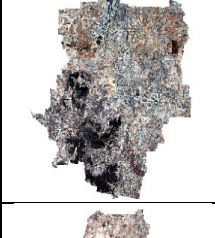   | 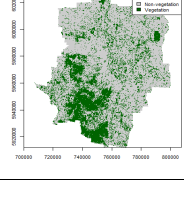   | 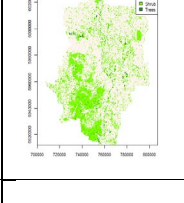   | 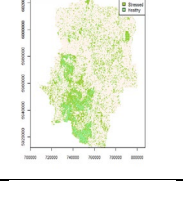   | 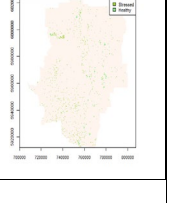   |
| Macedon Ranges | 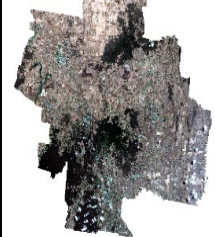  | 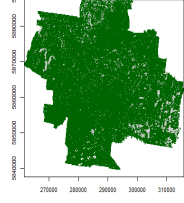  | 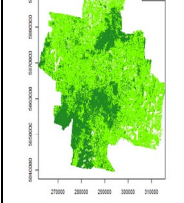  | 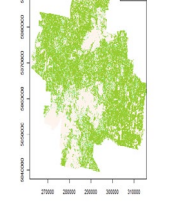  | 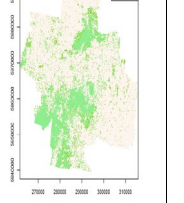  |
| Manningham     | 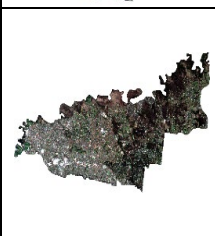 | 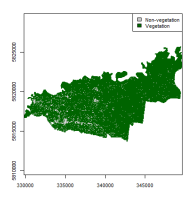 | 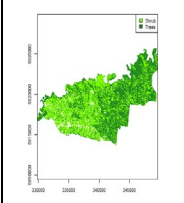 | 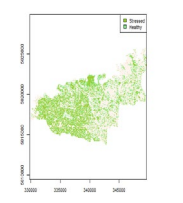 | 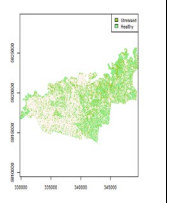 |
| Mansfield      | 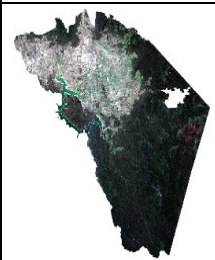 | 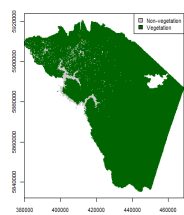 | 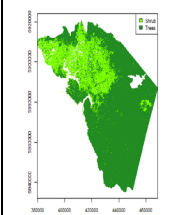 | 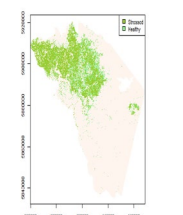 | 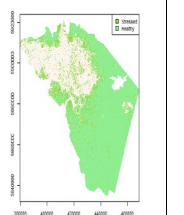 |
| Maribyrnong    | 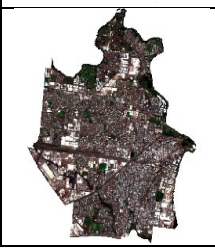 | 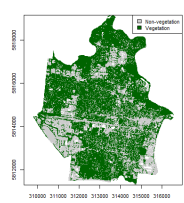 | 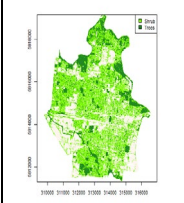 | 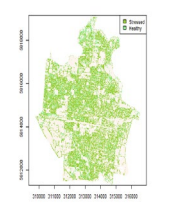 | 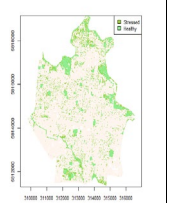 |

|           |                                                                                     |                                                                                     |                                                                                      |                                                                                       |                                                                                       |
|-----------|-------------------------------------------------------------------------------------|-------------------------------------------------------------------------------------|--------------------------------------------------------------------------------------|---------------------------------------------------------------------------------------|---------------------------------------------------------------------------------------|
| Maroondah | 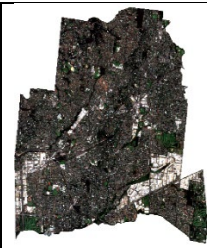   | 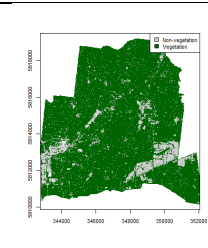   | 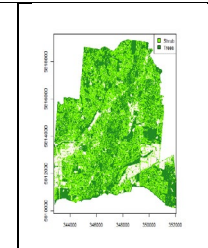   | 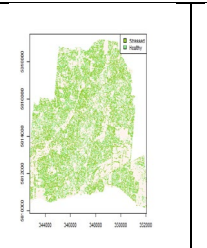   | 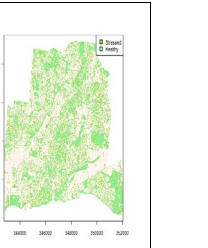   |
| Melbourne | 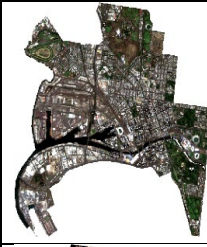   | 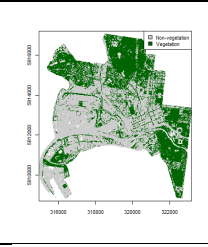   | 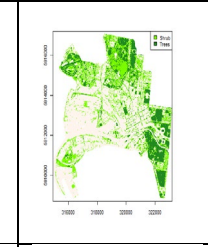   | 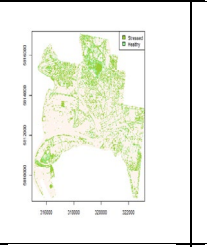   | 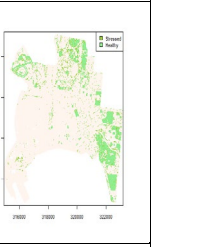   |
| Melton    | 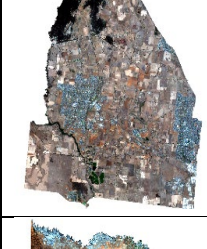   | 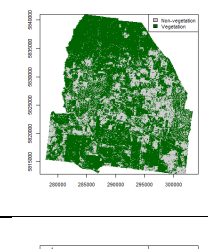   | 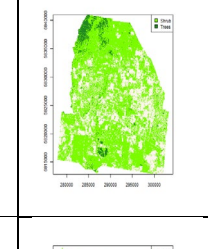   | 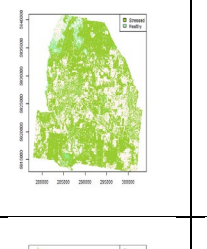   | 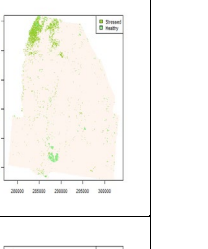   |
| Mildura   | 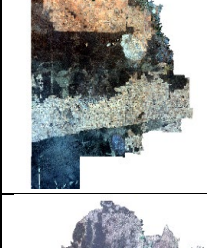  | 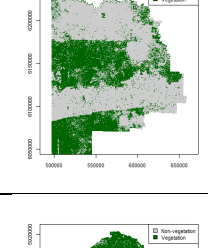  | 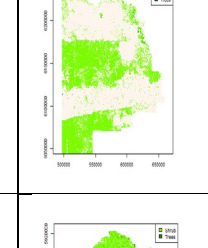  | 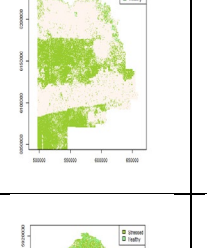  | 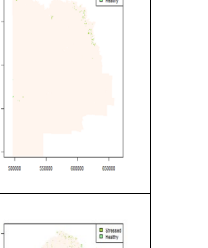  |
| Mitchell  | 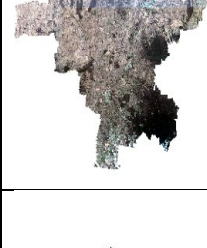 | 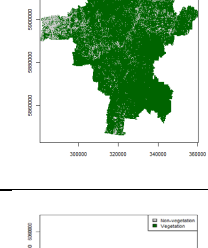 | 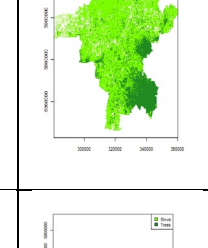 | 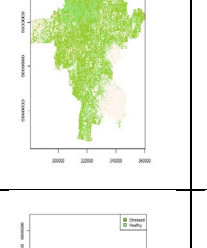 | 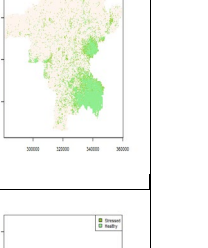 |
| Moira     | 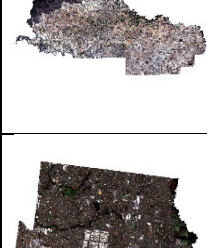 | 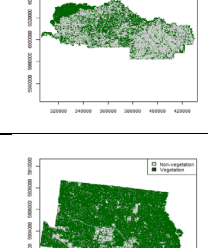 | 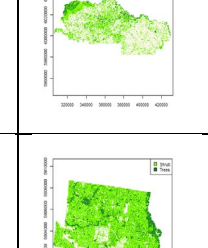 | 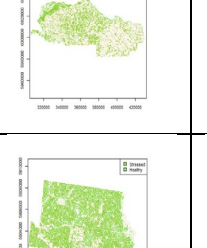 | 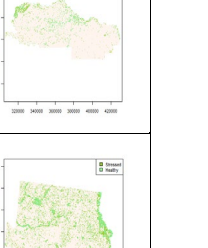 |
| Monash    | 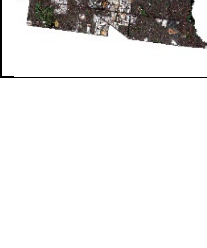 | 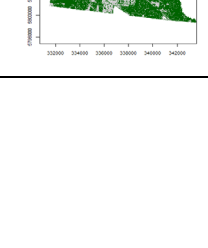 | 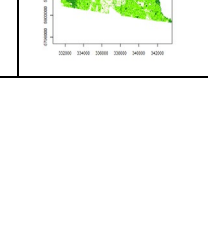 | 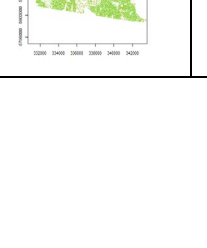 | 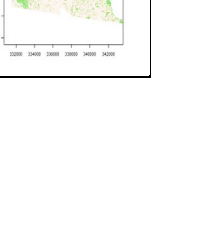 |

|                      |                                                                                     |                                                                                     |                                                                                      |                                                                                       |                                                                                       |
|----------------------|-------------------------------------------------------------------------------------|-------------------------------------------------------------------------------------|--------------------------------------------------------------------------------------|---------------------------------------------------------------------------------------|---------------------------------------------------------------------------------------|
| Moonee Valley        | 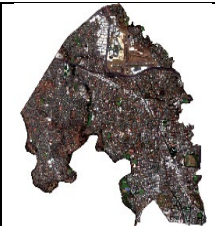   | 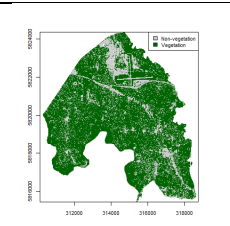   | 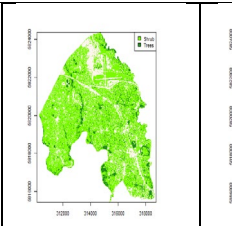   | 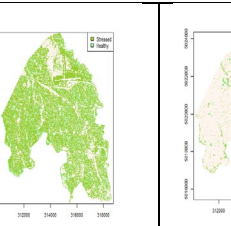   | 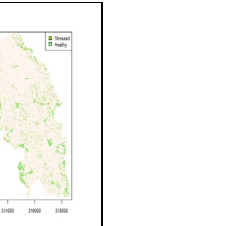   |
| Moorabool            | 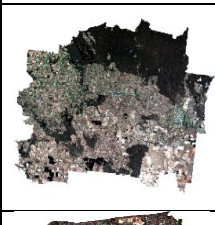   | 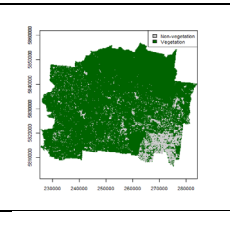   | 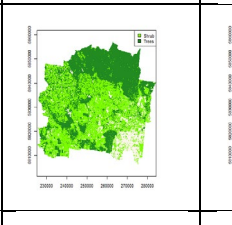   | 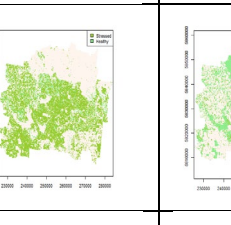   | 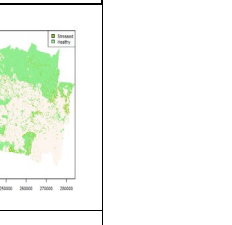   |
| Moreland             | 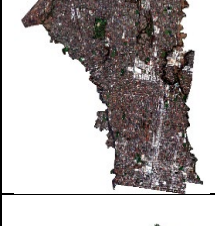   | 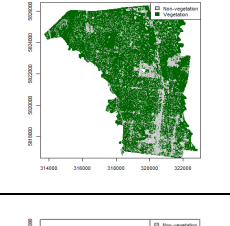   | 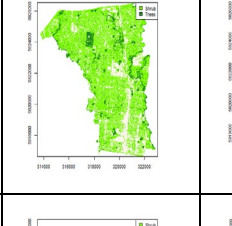   | 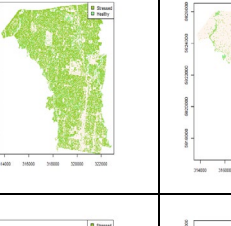   | 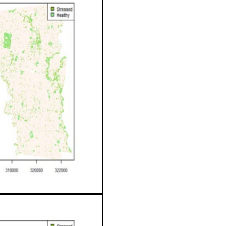   |
| Mornington Peninsula | 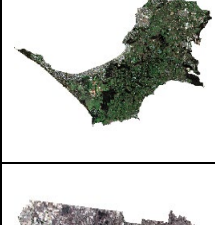  | 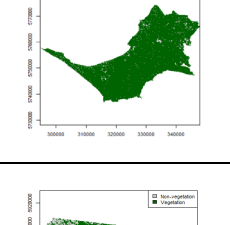  | 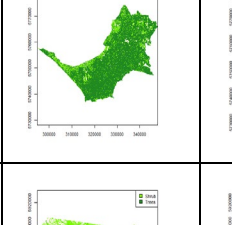  | 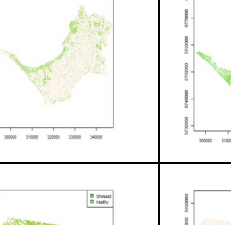  | 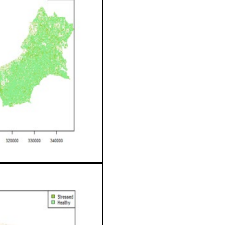  |
| Mount Alexander      | 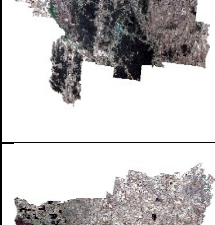 | 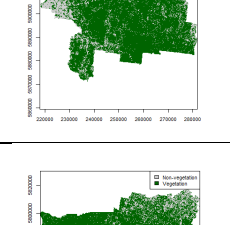 | 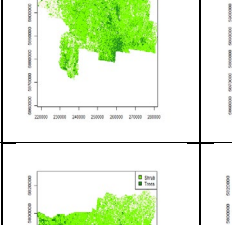 | 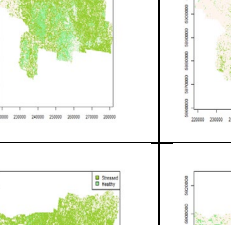 | 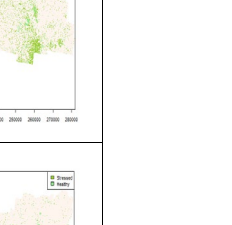 |
| Moyne                | 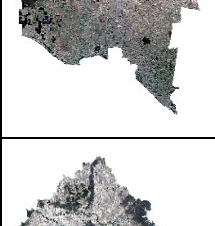 | 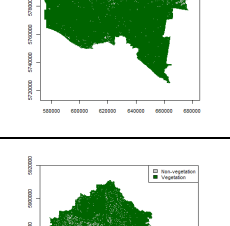 | 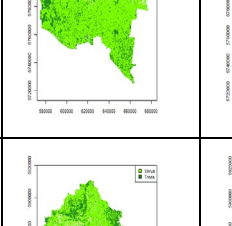 | 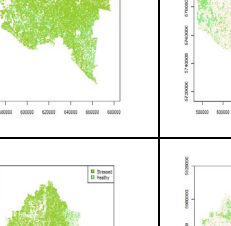 | 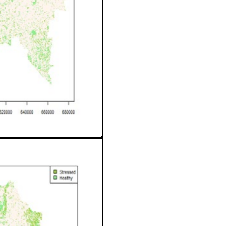 |
| Murrindindi          | 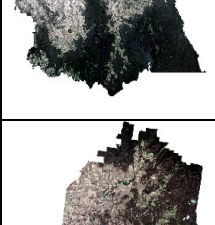 | 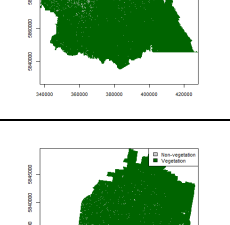 | 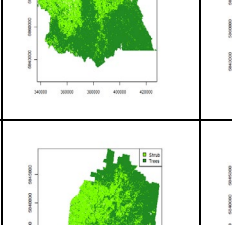 | 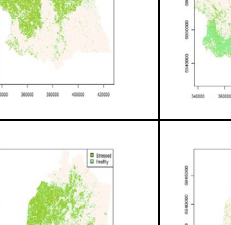 | 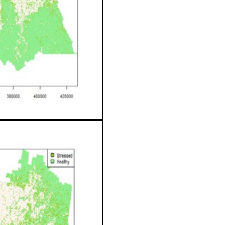 |
| Nillumbik            | 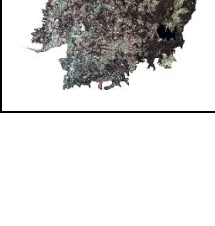 | 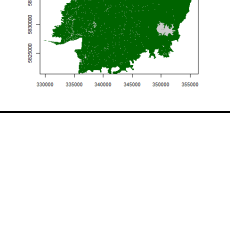 | 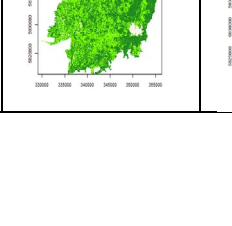 | 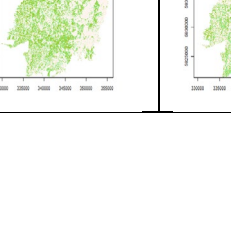 | 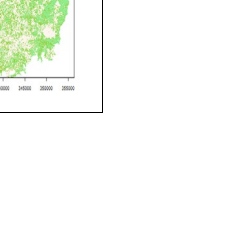 |

|                    |                                                                                     |                                                                                     |                                                                                     |                                                                                       |                                                                                       |
|--------------------|-------------------------------------------------------------------------------------|-------------------------------------------------------------------------------------|-------------------------------------------------------------------------------------|---------------------------------------------------------------------------------------|---------------------------------------------------------------------------------------|
| Northern Grampians | 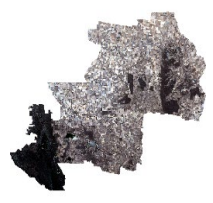   | 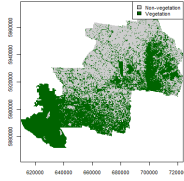   | 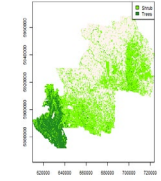   | 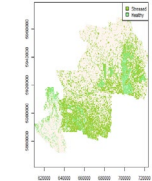   | 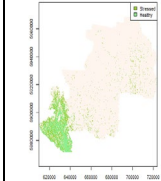   |
| Port Phillip       | 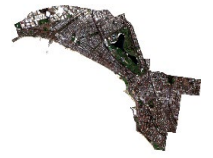   | 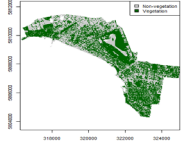   | 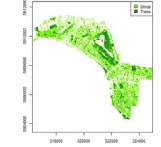   | 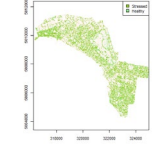   | 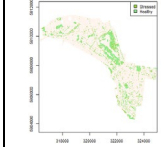   |
| Pyrenees           | 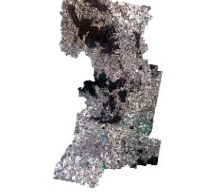   | 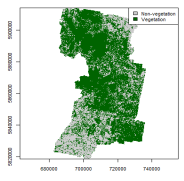   | 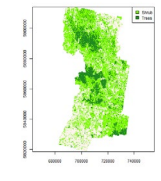   | 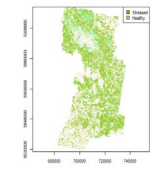   | 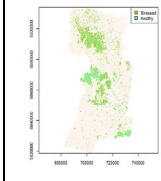   |
| Queenscliffe       | 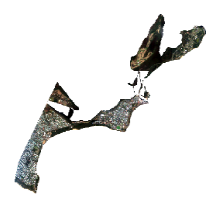  | 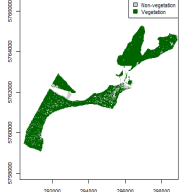  | 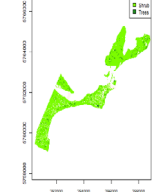  | 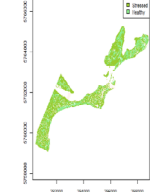  | 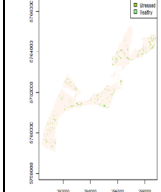  |
| Southern Gippsland | 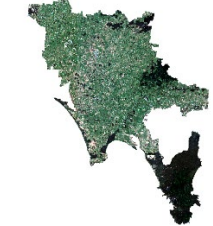 | 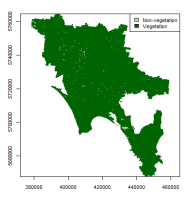 | 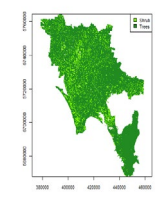 | 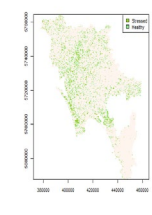 | 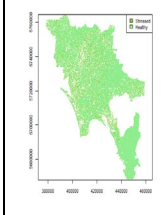 |
| Southern Grampians | 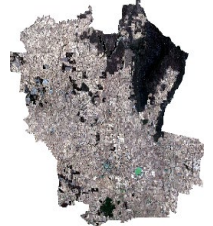 | 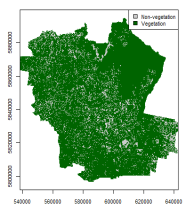 | 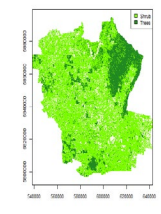 | 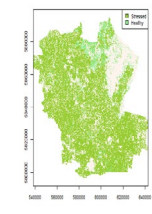 | 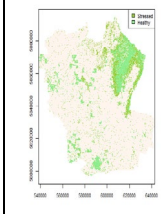 |
| Stonnington        | 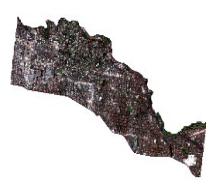 | 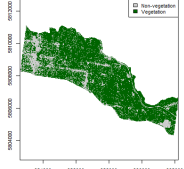 | 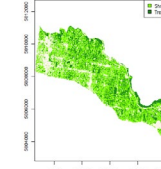 | 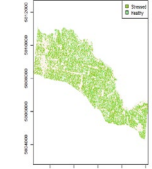 | 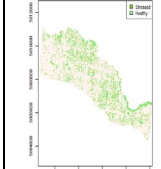 |
| Strathbogie        | 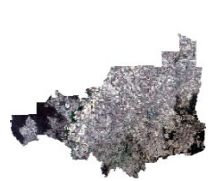 | 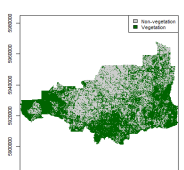 | 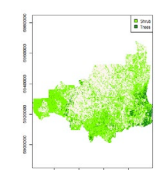 | 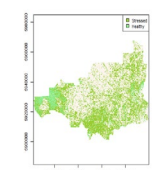 | 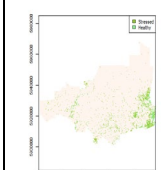 |

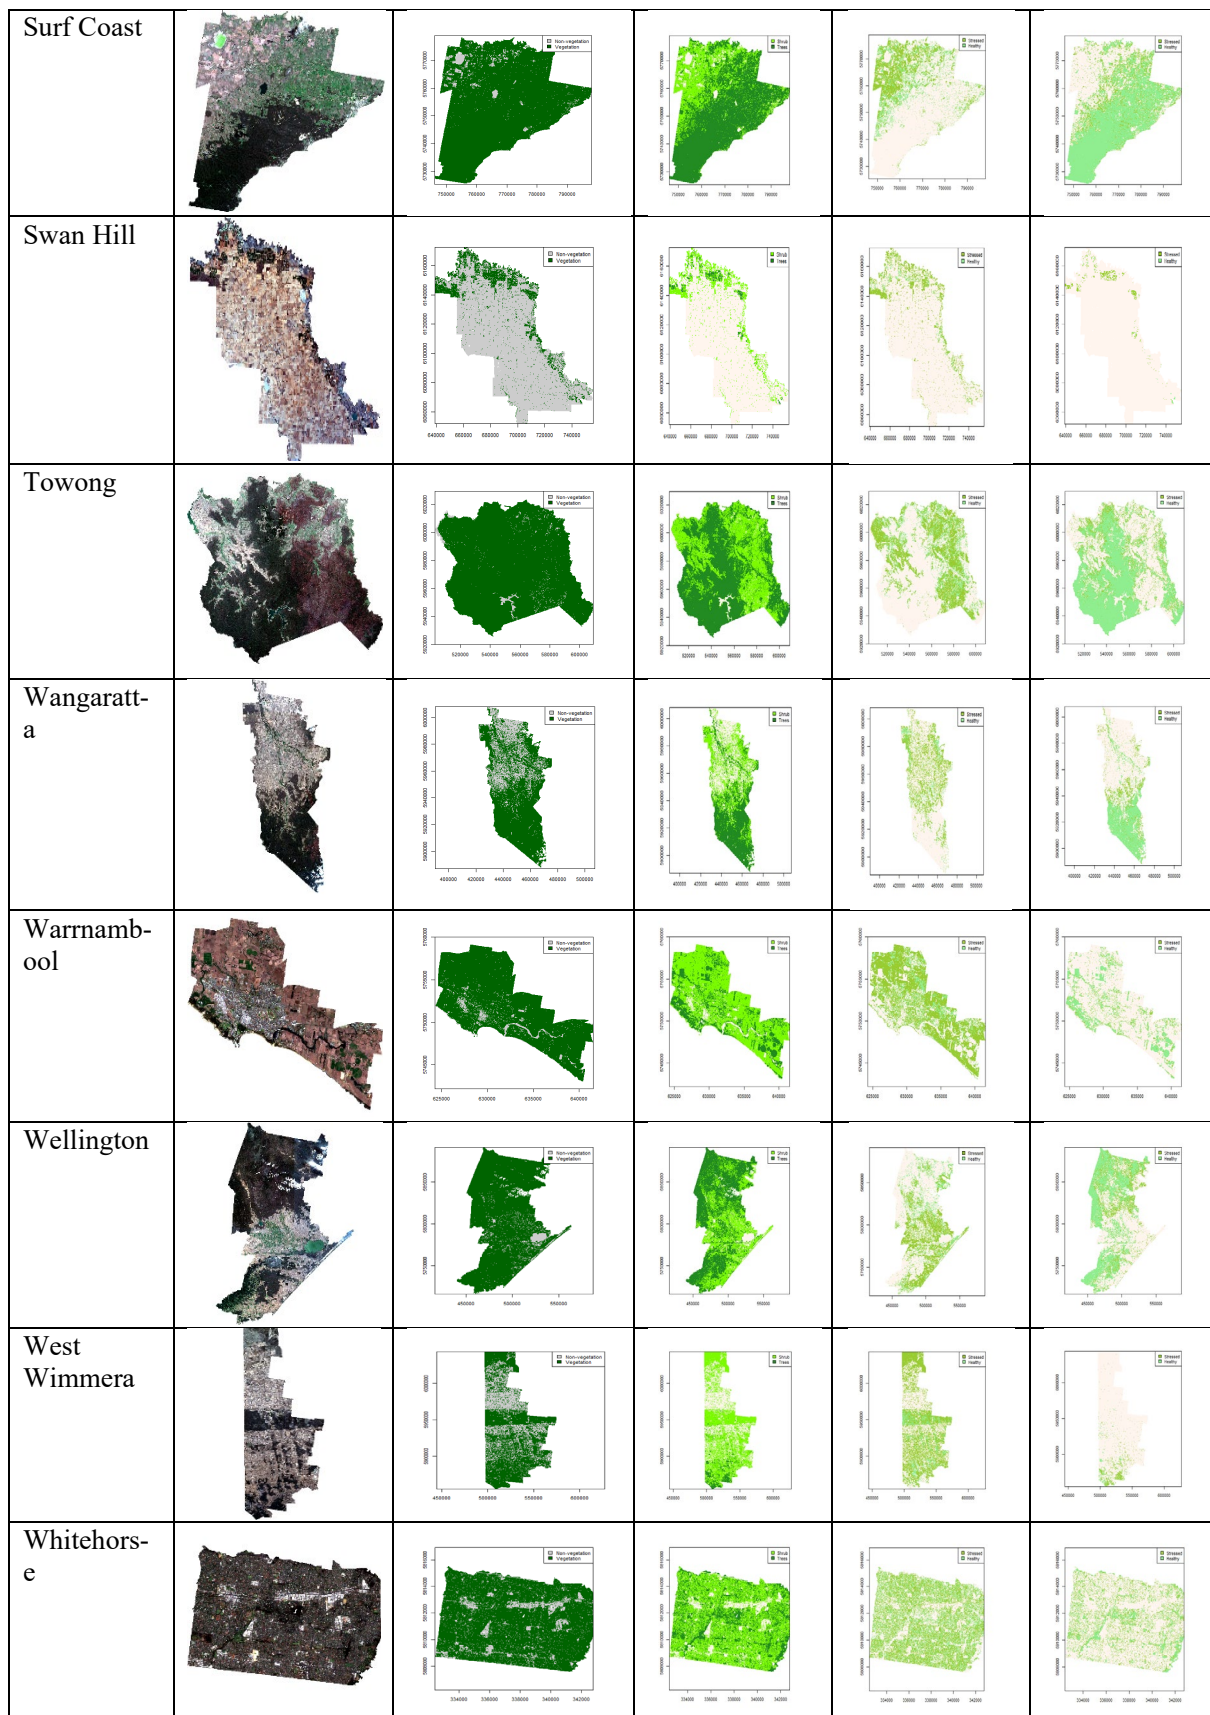

|              |                                                                                     |                                                                                     |                                                                                     |                                                                                      |                                                                                       |
|--------------|-------------------------------------------------------------------------------------|-------------------------------------------------------------------------------------|-------------------------------------------------------------------------------------|--------------------------------------------------------------------------------------|---------------------------------------------------------------------------------------|
| Whittlesea   | 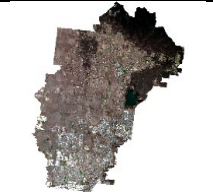   | 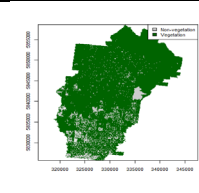   | 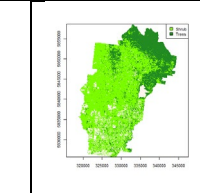   | 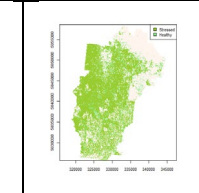   | 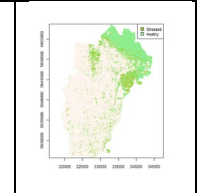   |
| Wodonga      | 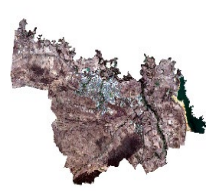   | 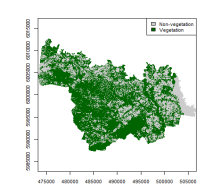   | 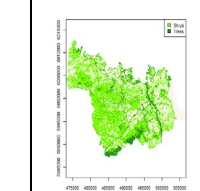   | 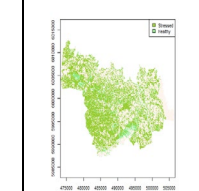   | 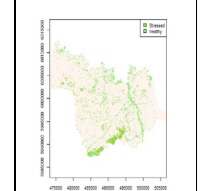   |
| Wyndham      | 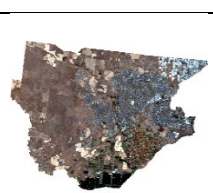   | 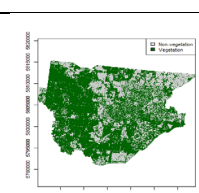   | 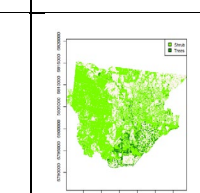   | 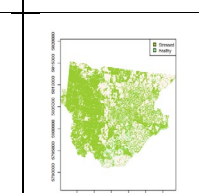   | 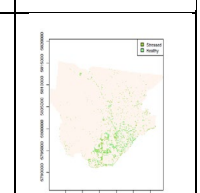   |
| Yarra        | 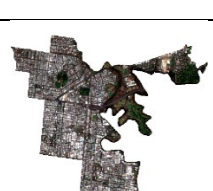   | 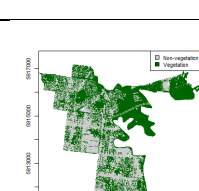   | 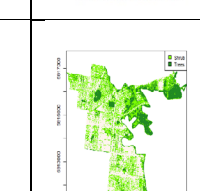   | 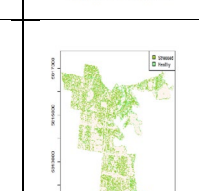   | 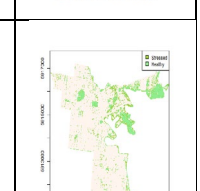   |
| Yarra Ranges | 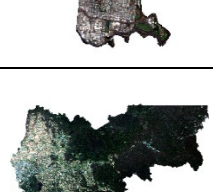  | 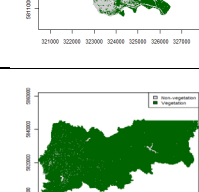  | 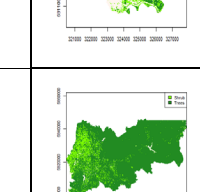  | 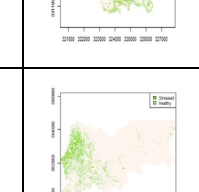  | 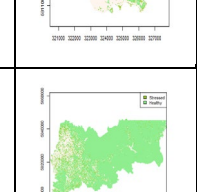  |
| Yarriambiack | 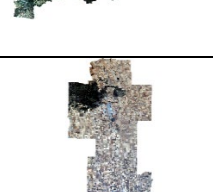 | 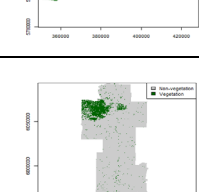 | 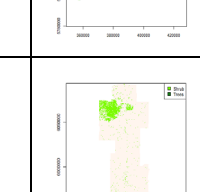 | 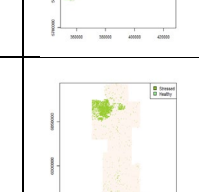 | 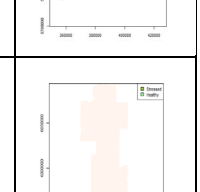 |
